# Supplementary material for: Evaluating urban environmental and ecological landscape characteristics as a function of land-sharing-sparing, urbanity and scale
Source: PLoS One. 2019 Jul 25;14(7):e0215796. doi: 10.1371/journal.pone.0215796 (PMC6657829; doi:10.1371/journal.pone.0215796)
Supplement: S2 Dataset — (CSV) [file pone.0215796.s006.csv]

GRID_ID	Mean_temp	Pop_SUM	NO2	Max_temp	Major_rd	Minor_rd	All_rds	Pop_300	LanCov1	LPI1	TCA1	Meff1	BuildingsSUM	GardensMPA	UrbanG_MPA	InstitutionalandOtherPrivate_MPA	PeriUrban_MPA	Public_MPA	UrbanFabric_MPA	DOMESTIC_BUILT	PUBLIC_BUILT	URBAN_FABRIC_BUILT	INSTITUTIONAL_AND_OTHER_PRIVATE_BUILT	PERI_URBAN_BUILT	Domesticgreen	PUBLICgreen	URBANgreen	INSTgreen	Pugreen	Domestic	Public	Inst	Peri_Urban	Urban	SHD1	vNDVI	BD	Pub_MPA	Build_MPA
F-8	24.847098	0	13.3688019725	33.426037	0	0	0	0	996192	98.3132769999999	976734	963152.840145	0	0	24.3	0	496982.202008	0	464.286458	0	0	.5841	0	.009	0	0	.0252	0	99.5328	0	0	0	99.5418	.6093	1.021697698	.725102	0	0	0
C-10	31.528607	0	12.7356447762	36.07838	0	0	0	0	996003	100	975312	996003	0	0	15.352941	0	993450.872948	0	112.918037	0	0	.5985	0	0	0	0	.0558	0	99.3123	0	0	0	99.3123	.6543	1.042593132	.525827	0	0	0
H-7	26.474073	8	17.9457493183	30.455354	0	0	0	0	993663	97.809921	961227	951086.722734999	180	2169	38.414634	0	197191.170105	0	302.178603	.0513	0	1.0314	0	.0288	.1656	0	.153	0	98.5338	.2169	0	0	98.5626	1.1844	1.095249395	.67388	4	0	50.554548
F-7	27.303676	0	13.4878099338	31.150975	0	56.481384	56.481384	0	988236	99.9854289999999	949563	987948.037212	1296	1638	92.680851	0	122267.882245	0	543.77963	.0009	0	1.6263	0	.0045	.1593	0	.387	0	97.785	.1602	0	0	97.7895	2.0133	.909768289	.621339	6	0	218.758783
H-15	28.264148	0	11.3020083488	31.268033	0	282.623208	282.623208	0	986562	99.962597	962694	985824.21741	4338	597	174	9	977056.595489	1457.54095	631.253537	.0378	0	1.5021	0	.0135	.1413	.144	.4698	.0027	97.6536	.1791	.144	.0027	97.6671	1.9719	1.054587696	.642811	13	1512	332.300012
G-7	24.735517	0	15.0145917601	31.777055	0	0	0	0	980190	99.998164	948771	980154.000661	648	0	96.061224	0	972370.142974	0	511.330654	0	0	2.2887	0	.0378	0	0	.4707	0	97.3521	0	0	0	97.3899	2.7594	1.16464901	.697963	5	0	135.887406
C-11	29.768008	0	14.5160583709	35.200102	79.284022	459.782629	539.066651	0	985113	99.972592	957591	984573.104589	2898	1318	40.736842	0	74671.665323	0	426.71003	.1296	0	1.5993	0	.0234	1.0566	0	.1584	0	96.9975	1.1862	0	0	97.0209	1.7577	1.254533431	.720449	20	0	149.791517
F-9	28.57747	0	14.4304730971	34.020784	0	0	0	0	986994	98.129776	957069	950766.112869999	3654	2434.5	273.477273	0	48441.373446	0	1871.119778	.0747	0	1.4292	0	.0108	.4122	0	1.2078	0	96.8292	.4869	0	0	96.84	2.637	.939483817	.759718	13	0	286.368919
E-10	28.260482	13	15.2320121234	36.292527	155.931439	0	155.931439	0	987120	99.9781179999999	957078	986688.090755	2673	2836.285714	94.757143	0	68340.253501	965.518308	386.679007	.1026	0	1.5912	0	.0072	1.8693	.1116	.7011	0	95.5836	1.9719	.1116	0	95.5908	2.2923	1.012430548	.705522	23	468	119.083652
D-11	28.927912	0	14.6531015405	35.356694	0	925.752078	925.752078	0	977679	99.976066	945261	977211.069758999	6984	2775.375	322.027397	9	103576.334263	0	1192.937096	.2367	0	2.1951	0	.0144	1.9962	0	2.3589	.009	93.1554	2.2329	0	.009	93.1698	4.554	.868215188	.686321	20	0	346.658263
G-8	25.942298	30	15.6859404168	31.132195	834.000514	0	834.000514	0	954729	68.6597979999999	910449	502456.351231999	2682	1465.875	247.043478	0	24955.114253	0	1842.567199	.0846	0	4.8033	0	.0162	1.0917	0	1.7019	0	92.2671	1.1763	0	0	92.2833	6.5052	1.220711253	.73236	18	0	150.435244
F-16	28.14005	0	11.2214934485	31.356893	0	1439.830443	1439.830443	0	934227	99.520245	882981	925287.403340999	7623	897.3	146.186916	0	39465.269693	0	1062.905676	.0387	0	6.7194	0	.0387	.8955	0	1.5984	0	90.6705	.9342	0	0	90.7092	8.3178	1.12009206	.655767	31	0	246.920749
G-16	28.628395	17	11.0541402526	32.105299	0	1617.124209	1617.124209	0	953820	99.968862	905670	953226.133326999	11160	1585.2	347.029412	0	56553.2697	0	1347.930929	.063	0	4.8789	0	.0162	2.2455	0	2.3139	0	90.4464	2.3085	0	0	90.4626	7.1928	.954293296	.626258	32	0	348.986147
E-16	27.757626	28	11.2288449146	30.771012	434.510655	1575.310107	2009.820762	0	952407	99.9725959999999	903960	951885.081646	5436	2120.25	209.090909	24.75	31208.50189	0	1169.284498	.2466	0	4.887	0	.0216	2.3139	0	2.0556	.0099	90.4293	2.5605	0	.0099	90.4509	6.9426	1.065288773	.669413	39	0	147.180486
D-12	27.523032	0	15.3337274547	31.63012	1063.574878	1258.888452	2322.46333	0	939663	75.5753919999999	896544	580217.278007999	5589	1109	683.64	18	44615.495675	0	6060.12216	.1071	0	6.3351	0	.0162	.891	0	3.4119	.0054	89.199	.9981	0	.0054	89.2152	9.747	1.113693493	.720499	26	0	218.102806
G-15	28.330724	19	11.1531909997	30.787472	0	2738.377803	2738.377803	0	939564	99.8553579999999	876024	936848.283707999	6606	1058.625	374.551402	9	126906.094176	0	1256.96537	.0657	0	6.2928	0	.0288	.7812	0	4.0563	.0009	88.7364	.8469	0	.0009	88.7652	10.3491	1.158313893	.548239	30	0	223.830625
H-17	29.488257	0	11.4718613425	33.018047	0	1563.805377	1563.805377	0	962046	99.953225	911538	961146.310008	6786	2661.545455	464.195876	13.5	35350.724848	13.586697	667.892996	.2124	.0009	4.0275	0	.0171	2.6883	.171	4.509	.0054	88.3323	2.9007	.1719	.0054	88.3494	8.5365	1.033202287	.615267	44	33.057692	156.221717
D-16	27.54243	96	11.6530575743	30.014676	601.659736	2162.409498	2764.069234	4	943344	99.547779	888003	934842.557033	12456	2145.272727	328.628571	0	35731.683587	0	1060.760438	.8208	0	5.0049	0	.0225	3.8691	0	4.5045	0	85.7394	4.6899	0	0	85.7619	9.5094	1.058877402	.616109	81	0	160.195631
E-15	27.190115	252	11.7225440093	31.398966	1225.194838	1285.685086	2510.879924	93	962793	99.862587	916623	960149.002468	9396	1136.793103	169.620438	86.210526	51912.311109	2125.349567	472.227076	.7704	.0252	3.141	.0576	.0225	2.4678	8.0163	2.2572	.1062	83.0952	3.2382	8.0415	.1638	83.1177	5.3982	1.125252998	.627183	63	4537.5	154.374559
H-16	28.940067	20	11.239297844	32.597205	0	3022.166186	3022.166186	4	938601	99.921372	877599	937125.675718	8991	1228.5	401.206612	11.571429	13352.575768	5951.25	1977.661609	.0981	.0279	6.1803	0	.0162	1.3725	4.7331	4.7421	.0081	82.7838	1.4706	4.761	.0081	82.8	10.9224	1.037433996	.671951	35	6801.428571	259.977856
E-11	28.758506	65	16.0464733715	36.571583	1054.916185	1722.269111	2777.185296	5	947331	75.385478	903438	595690.913167	5544	2250	609.9375	700.997374	47757.431201	11492.936884	2158.821606	.3213	.009	5.3307	.0009	.0126	1.2978	5.7654	5.823	.3681	81.036	1.6191	5.7744	.369	81.0486	11.1537	1.081055456	.698986	55	9672	99.365806
H-18	27.169362	42	12.0690313631	32.819351	0	2672.111442	2672.111442	18	905859	99.4525639999999	825399	895973.564206999	5499	2037.9375	101.120192	9	10764.347224	12020.180063	897.945233	.378	.0054	9.0999	.0018	.0468	2.8629	4.8726	2.07	.0018	80.8101	3.2409	4.878	.0036	80.8569	11.1699	1.331959269	.718772	45	15978	123.736661
I-15	28.993234	0	12.0148154836	32.849361	0	1486.412088	1486.412088	0	890667	99.0319609999999	821457	873544.859906999	4365	1186.2	353.268908	72	17629.7469	24149.647489	1807.048016	.0684	.0153	10.989	0	.0225	.5247	4.8429	4.2021	.036	79.2567	.5931	4.8582	.036	79.2792	15.1911	1.287649671	.667015	29	12078	150.671472
I-14	26.131639	0	11.9408317626	30.869652	0	0	0	0	948420	98.487379	912744	920023.848909	13860	549	170.021739	18	98555.841205	149629.827869	1913.176482	.0081	.0198	5.3739	0	.0072	.0468	14.9319	.7839	.0018	78.7914	.0549	14.9517	.0018	78.7986	6.1578	1.098818731	.713748	10	37424.25	1393.46578
H-8	25.632567	0	17.6464498231	28.989755	1137.617761	91.803136	1229.420897	0	933372	54.0816519999999	890199	365917.380588	1341	0	187.925373	887.204418	25225.037465	41359.774873	3237.893278	0	.9198	5.9058	0	.0378	0	11.5317	2.5164	1.0125	78.2262	0	12.4515	1.0125	78.264	8.4222	1.316410998	.728879	2	41358	656.229876
G-6	25.353156	0	15.1659205132	29.218479	0	0	0	0	999900	100	971460	999900	126	22.5	331.65	9	254087.103565	2346.25077	383.235309	0	.0036	.6318	0	.0189	.0045	21.0438	1.9809	.0027	76.2399	.0045	21.0474	.0027	76.2588	2.6127	1.223197054	.722805	3	7128.9	56.202483
F-17	27.942223	92	11.1340486832	31.270267	0	4522.449195	4522.449195	0	939672	99.841008	866862	936686.723067	11403	2542.68	673.803468	23.25	6337.380912	0	1299.592646	.4671	0	5.9661	0	.0162	5.859	0	11.6442	.0279	75.9834	6.3261	0	.0279	75.9996	17.6103	1.162242679	.649619	85	0	136.366567
F-10	26.790653	707	15.9973783431	33.338552	1024.80784	1827.137227	2851.945067	426	886293	77.672959	809244	574266.478741	17865	1476	147.972222	15.75	16795.020932	696.792684	382.475051	1.5957	.3861	9.6075	0	.0135	1.728	6.3477	4.8168	.0126	75.4461	3.3237	6.7338	.0126	75.4596	14.4243	1.329322051	.734671	89	1743.631579	202.422899
I-16	28.742516	155	12.5894109753	33.541058	0	3451.003113	3451.003113	70	880803	97.5497359999999	825255	838227.547232	36729	1173.15	115.350932	12	6624.204697	574.249284	1300.942163	.5391	1.1169	10.665	0	.0009	1.8945	7.9704	3.7386	.0036	74.0358	2.4336	9.0873	.0036	74.0367	14.4036	1.288346286	.734535	90	891.267327	410.25625
G-9	26.609487	0	16.4582895697	29.272954	1033.248801	0	1033.248801	0	936684	70.9337409999999	896283	549547.266344	2853	1179	121.114286	15.52554	159450.053431	285499.238959	3771.013944	.009	.3429	6.264	0	.0135	.1035	28.3671	1.2627	.0081	63.5895	.1125	28.71	.0081	63.603	7.5267	1.225096071	.757346	8	284436	344.797426
O-12	25.560894	711	18.538519706	29.983762	0	2162.817005	2162.817005	744	952785	99.791244	920565	948811.294563999	18765	450.6	64.285714	578.956584	21993.443063	9629.349724	256.862602	1.1961	.2754	3.8493	0	.0045	2.8431	30.5802	1.1889	.7461	59.2776	4.0392	30.8556	.7461	59.2821	5.0382	1.377933408	.770452	72	22219.71429	263.07801
H-9	27.357715	0	16.9280535182	30.897755	1019.806437	282.010004	1301.816441	0	885078	80.923715	825282	610126.200768999	25146	396.580645	2175.182609	45.743175	14516.664914	8682.900724	8039.216801	.2979	0	11.2248	0	.2088	.9234	2.6334	25.0308	.0936	57.7197	1.2213	2.6334	.0936	57.9285	36.2556	1.229268735	.671785	42	6637.5	595.743839
H-6	25.431134	33	18.2798696221	30.820327	3579.724057	336.21701	3915.941067	18	939456	85.652016	889191	693998.03468	10116	1524.6	469.774648	59.48194	49651.670434	2356.920739	1955.975188	.27	.2133	5.7222	.0009	.0144	1.1844	30.1446	6.6627	.6084	54.6039	1.4544	30.3579	.6093	54.6183	12.3849	1.369704599	.754516	43	2834.75	239.009019
G-14	27.363413	0	11.7756206958	31.05258	0	0	0	0	881658	98.1921559999999	834858	850138.62412	108	0	272.479592	11.139409	133492.63526	3544.423559	3607.656669	0	1.0044	10.9008	0	.0036	0	28.6677	5.2713	.0117	53.5221	0	29.6721	.0117	53.5257	16.1721	1.255361454	.623954	1	9068.727273	118.485
F-15	27.180875	645	11.8403765153	31.115842	0	3900.406386	3900.406386	673	917901	98.009589	853731	881777.558394	18441	2582.307692	79.661538	359.087325	10182.014403	6613.699685	336.698219	1.8126	.7947	5.3928	.225	.0126	4.7232	32.8662	1.539	.5211	52.0668	6.5358	33.6609	.7461	52.0794	6.9318	1.312036835	.682482	107	8918.052632	175.86969
H-14	28.103362	0	12.1010957271	32.400223	0	0	0	0	715725	88.343288	648963	559612.612021	864	0	280.144068	52.060324	518020.056137	6094.197361	1742.649813	0	17.0397	11.277	0	.0036	0	16.353	3.3066	.0423	51.9426	0	33.3927	.0423	51.9462	14.5836	1.272206377	.618704	6	6119.018182	142.337817
O-20	28.363269	19	20.1502313941	31.326395	4048.536101	4105.946708	8154.482809	0	597888	51.9568879999999	515754	197042.734193999	108954	1341	522.393443	63	15427.613531	603.160125	18427.658878	.0855	.0693	40.2642	0	.0234	.3168	1.9134	9.5022	.0126	47.7774	.4023	1.9827	.0126	47.8008	49.7664	1.311007491	.56259	49	1432.285714	2224.788412
J-13	26.494363	207	13.9251518342	30.028985	1491.269994	700.079936	2191.34993	15	941706	99.115966	892818	925145.184241999	12375	885.681818	530.574324	16.311856	8812.892136	2100.721833	1513.411238	.4689	.5643	5.1939	0	.0135	1.5102	40.5072	7.8255	.0342	44.0235	1.9791	41.0715	.0342	44.037	13.0194	1.270435771	.737071	41	5341.207792	306.282589
K-12	25.290452	187	15.6704360735	29.68594	1077.007082	1129.09192	2206.099002	156	931356	99.6250629999999	879030	924385.92911	11331	865.125	624.461538	130.746204	7367.975021	2610.241358	882.489131	.6552	1.8387	4.8321	.018	.0045	.7506	37.5597	9.7173	1.5786	42.7068	1.4058	39.3984	1.5966	42.7113	14.5494	1.451327656	.752964	63	5663.314286	182.821562
I-3	27.128871	1542	18.7964040302	29.98883	1113.978969	4585.668838	5699.647807	1275	752589	81.7773049999999	658863	512347.164576	80208	1339.553571	154.791569	387.535503	11352.907721	2609.60001	440.881247	7.3557	.1962	15.9534	.2907	.0126	7.5276	19.98	6.5592	.7245	39.7134	14.8833	20.1762	1.0152	39.726	22.5126	1.415352325	.709408	416	4099.22449	195.978418
O-18	27.201219	1121	18.170114856	30.625053	926.395905	5395.070831	6321.466736	562	875250	96.8586119999999	783162	821226.841727999	39591	3343.064516	111.78	188.602978	3520.169084	5600.892177	319.716585	2.6109	1.0494	8.8992	.2853	.0054	7.758	35.3961	4.5027	.5877	39.0456	10.3689	36.4455	.873	39.051	13.4019	1.301235783	.736609	194	10766.64706	206.47578
L-12	26.980388	814	17.9297128033	30.394499	4125.270872	2121.535384	6246.806256	645	836901	41.824302	752571	261797.110378999	24777	1780.758621	360.731449	47.127273	3259.449854	2616.255462	923.726787	1.71	.9288	14.1327	0	.0072	3.3534	32.3154	10.143	.2592	37.1124	5.0634	33.2442	.2592	37.1196	24.2757	1.408102076	.702932	121	4118.333333	207.623344
P-14	27.28785	0	18.4414649293	31.235089	0	677.054906	677.054906	0	911223	99.024169	868797	893572.108122	8667	1348.714286	1338.652174	99.375	10916.937651	8121.228971	3771.018473	.1296	.0117	8.856	0	.0477	.8001	43.7616	12.2742	.2385	33.8436	.9297	43.7733	.2385	33.8913	21.1302	1.455287942	.74379	62	17575.92	144.035582
I-18	27.545701	548	13.3446610325	30.33327	1258.042986	5183.295249	6441.338235	206	851256	99.5961259999999	699543	844395.474055	67221	15447.11538	74.072289	48.158829	4148.8295	1113.706809	377.759629	3.7125	.1071	11.2005	0	.0018	36.6921	10.485	5.5539	.2457	31.464	40.4046	10.5921	.2457	31.4658	16.7544	1.339020087	.739205	358	2182.591837	190.883456
E-12	28.009213	1906	15.0002553871	30.867299	0	7268.758789	7268.758789	1535	625140	78.1888859999999	520920	386869.845955	117927	777.252101	123.616667	2485.173316	63085.084389	666.508706	727.524675	5.4171	4.0275	26.2584	2.2473	.0009	3.8124	12.7143	6.6699	7.1946	31.4415	9.2295	16.7418	9.4419	31.4424	32.9283	1.361546521	.630466	337	1044.391304	352.928089
Q-14	26.428805	1242	19.0514468011	31.317018	5012.529858	3315.690572	8328.22043	1035	829746	61.2339199999999	742491	351386.202247	23274	5619.6	289.348432	46.084373	296072.44815	8053.850468	918.114628	2.2815	1.1286	13.9203	.0009	.0009	6.0723	38.4228	8.2674	.3231	29.5371	8.3538	39.5514	.324	29.538	22.1877	1.306956666	.751695	180	12367.6875	133.601745
O-13	27.599919	1528	19.0394731236	30.375662	3958.175638	5523.019485	9481.195123	586	741573	36.484338	628866	198892.022367	52425	4572	178.764706	244.663286	12558.048531	3304.877795	605.553271	5.0418	.9855	20.1294	.0009	.0081	9.4923	27.1512	9.1044	.531	27.7056	14.5341	28.1367	.5319	27.7137	29.2338	1.492397874	.711023	363	6875.341463	146.690275
N-13	26.16423	1269	19.2067102926	30.599218	3718.025537	4297.497922	8015.523459	1164	730611	41.442984	626337	236624.717586999	52884	2021.785714	203.09434	134.411093	66552.308823	1787.515893	872.953387	3.7737	.8766	21.7665	.6372	.0036	7.5663	28.1043	9.6732	1.0692	26.676	11.34	28.9809	1.7064	26.6796	31.4397	1.590232043	.721911	254	4682.903226	211.025932
I-9	26.020771	562	17.3784859713	30.290971	0	1867.693227	1867.693227	351	671247	84.4709919999999	576801	481366.591167	42822	3693.461538	421.637982	35.15625	10455.699721	1659.98487	1902.219397	2.1717	6.4152	24.2712	.0009	.0045	2.7126	22.5153	14.1399	.1116	26.0802	4.8843	28.9305	.1125	26.0847	38.4111	1.551453194	.673972	160	3139.532609	269.378779
G-12	26.540567	23	13.9579418777	30.660509	687.154297	170.069346	857.223643	0	641547	74.5072459999999	576000	372534.601111	33093	1300.5	457.675127	19.348468	6761.984771	2688.132365	5599.059391	.0522	5.2398	29.2059	.0009	.0144	.4761	27.774	8.8452	.0531	25.7265	.5283	33.0138	.054	25.7409	38.0511	1.46177088	.69177	82	4566.328767	405.651349
J-4	27.442361	947	20.6717037928	31.277354	7201.641739	2843.369842	10045.011581	503	648036	36.478529	530496	139288.541247999	78723	1108.032787	182.198594	1253.421745	5199.704299	1368.368472	1910.561012	3.0456	1.1196	29.8197	1.5651	.0135	3.7071	19.5417	10.3482	6.4656	24.3333	6.7527	20.6613	8.0307	24.3468	40.1679	1.368067892	.710192	189	1789.215517	418.537804
I-7	26.733933	877	20.2162677336	29.832562	7658.721266	1684.646281	9343.367547	722	766089	30.151197	662526	138164.813981999	20394	4217.625	343.036184	1014.41688	7945.27375	9666.35574	1204.485538	2.5362	1.0701	19.8414	.1917	.0189	4.2912	33.8184	10.4382	5.0139	22.9266	6.8274	34.8885	5.2056	22.9455	30.2796	1.398244032	.695252	146	19336.5	142.133758
I-17	28.267116	1235	12.914551881	32.253974	0	4839.59144	4839.59144	990	887895	95.91303	788409	817001.207875999	44604	10677	112.429467	511.543103	10250.498005	15705.638691	290.489307	4.1058	.6336	6.606	.2673	.0018	15.1254	46.4814	3.5613	.6039	22.4496	19.2312	47.115	.8712	22.4514	10.1673	1.337849256	.74856	267	27793.58823	170.220764
H-12	26.491717	1677	14.4442980715	31.127354	0	5580.626784	5580.626784	408	831843	95.620327	732114	760850.009315	59319	3494.6	284.559727	1248.566536	22308.158555	4041.079308	482.67567	4.7943	.8334	11.5353	.0477	.0054	10.8585	38.3589	8.3331	2.9331	22.2642	15.6528	39.1923	2.9808	22.2696	19.8684	1.44100366	.717699	342	6666.40678	176.156814
F-6	28.167138	3111	14.6740579724	30.660544	691.274024	9921.242652	10612.516676	1404	620811	73.634005	483894	343427.587569999	130797	2728.744898	78.747155	353.605263	5250.659677	1080.777498	276.382231	12.8799	.5796	23.778	.5778	0	13.6611	20.3949	6.2388	.7659	21.0447	26.541	20.9745	1.3437	21.0447	30.0168	1.402433794	.668219	710	2264.612903	188.019667
M-12	25.62319	233	18.5793280725	30.829537	6143.502754	1553.877574	7697.380328	96	806328	63.882936	738198	383282.412134999	24282	726.6	1048.123153	316.936275	4723.268135	6220.012542	5019.979308	.8595	1.2366	17.5626	.1395	.0072	1.2879	35.4888	21.2634	1.3887	20.7279	2.1474	36.7254	1.5282	20.7351	38.826	1.357691668	.732465	93	9494.307692	263.42593
H-10	26.459354	1364	16.3871709425	34.457577	733.128244	4390.445298	5123.573542	801	759771	85.2154139999999	669924	554672.290965	85572	3672.529412	383.546512	49.402777	44886.457458	4813.322907	731.78148	4.3326	.7659	16.7382	.0027	2.4066	8.3169	33.8229	13.1805	.3474	19.9971	12.6495	34.5888	.3501	22.4037	29.9187	1.340130128	.676964	257	11621.7	337.232497
J-12	27.030822	3614	15.2782729257	29.296873	0	9598.834673	9598.834673	1614	713223	76.5530559999999	557325	419672.601979	114993	6038.647059	181.533333	44.999916	10004.20619	1665.702492	280.353796	10.1664	.1908	18.5517	.081	0	20.2581	19.3257	12.1725	.171	19.0476	30.4245	19.5165	.252	19.0476	30.7242	1.340965727	.69883	660	4453.977273	177.450645
O-19	27.637916	115	20.3499251947	29.955576	1810.443826	2113.531734	3923.97556	73	614376	76.6128559999999	541917	381522.553644999	16236	4033.8	525.958333	15.454082	17154.496118	12032.93339	5022.212691	.2322	.6273	38.1231	.0009	.0018	3.6603	26.9172	11.304	.0495	18.8802	3.8925	27.5445	.0504	18.882	49.4271	1.357260795	.725071	42	19942.71429	385.006221
M-4	26.699717	1855	18.4696301619	30.9705	1116.253593	6059.039994	7175.293587	1194	666837	86.962331	564687	505457.82302	103599	1377.103448	112.837294	917.385611	79171.262822	1923.916251	711.53276	5.2083	1.1187	26.1081	.8901	.0009	6.7437	33.7212	6.1488	4.1229	15.9003	11.952	34.8399	5.013	15.9012	32.2569	1.317646592	.735191	384	3287.462264	273.227113
H-13	28.302937	375	13.3494577634	32.014475	1162.324116	2238.98076	3401.304876	323	559494	76.23138	468189	327457.75292	34875	4900.090909	174.101205	188.608696	138094.574974	1787.501442	2222.899559	1.6137	6.0435	36.405	.2601	.0018	3.7476	30.9339	7.1973	.1737	13.77	5.3613	36.9774	.4338	13.7718	43.6023	1.354439491	.66277	141	2835.553846	252.962634
I-6	27.832163	3372	20.439242225	31.132225	1835.59107	10926.427035	12762.018105	2803	613161	41.0368569999999	443340	167413.190814	115308	4162.038462	128.421583	280.945946	68550.421501	845.680837	391.383119	11.4489	.7452	26.775	.1008	0	21.0276	16.4223	8.8749	.9387	13.6305	32.4765	17.1675	1.0395	13.6305	35.6499	1.397052576	.648043	700	1476.076923	173.7024
I-12	27.639603	119	14.0626188074	30.38504	953.222319	313.598466	1266.820785	67	947250	96.767696	906660	887638.039182999	15201	969.5	574.70339	77.288876	2772.48556	9320.151089	868.135416	.5337	1.0242	4.1355	.0027	.0009	1.188	72.5148	6.7869	.1674	13.6062	1.7217	73.539	.1701	13.6071	10.9224	1.264031331	.708044	63	16091.80435	243.167348
N-18	29.259205	488	15.6197051309	31.232821	0	3753.289434	3753.289434	438	919926	99.4354979999999	847854	909572.60794	23220	1480.5	85.611386	76.469343	1069.002697	8273.598494	232.648265	1.1313	1.3401	5.6223	.0036	.0009	7.3845	68.3001	3.4389	1.0593	11.7972	8.5158	69.6402	1.0629	11.7981	9.0612	1.142481346	.726938	121	15817.09091	195.431347
I-13	27.564535	8	12.9097648647	31.59983	0	771.462787	771.462787	0	871893	92.494607	828819	750423.996336	6210	0	205.690909	51.665131	24029.636583	13322.970939	813.362068	0	4.9338	7.9263	0	.0009	0	75.15	2.2122	.2637	9.6642	0	80.0838	.2637	9.6651	10.1385	1.327304481	.707815	29	44431.5	217.018164
F-13	26.520531	4	14.0206427528	31.209469	1681.202221	2762.287427	4443.489648	0	609723	73.4526989999999	513837	333211.238888999	72135	25.5	523.196013	26.135929	22861.877625	1282.199942	2649.27819	.0018	10.0296	29.0502	0	.0513	.0135	35.8227	15.7401	.243	9.1107	.0153	45.8523	.243	9.162	44.7903	1.480458894	.666208	72	4774.6875	1009.743874
J-16	30.116432	3753	14.1354104373	32.260917	0	13110.759098	13110.759098	1699	416466	41.126767	273483	82641.145741	184464	1540.314607	73.598331	3725.374638	6683.833214	625.903023	599.79511	12.0753	1.251	44.9289	.5229	0	15.2568	10.1916	6.165	.9693	8.6031	27.3321	11.4426	1.4922	8.6031	51.0939	1.132642484	.635027	725	853.133333	257.601957
N-5	28.004259	3240	18.2538687545	30.822683	1810.544063	8416.44042	10226.984483	2985	593829	22.450402	475749	96205.1698369999	112446	1341.272727	111.915162	18.307622	1407.090357	2572.385032	500.680194	9.5067	1.6542	29.7549	.0045	0	8.1522	36.387	6.2154	.0522	8.2377	17.6589	38.0412	.0567	8.2377	35.9703	1.33679956	.70772	646	4438.674419	176.025173
N-20	28.564698	2295	17.7137012632	31.905161	1127.495163	8853.559903	9981.055066	914	709686	96.8803099999999	497700	666123.679178999	129933	13724.51351	60.619469	245.262625	26003.083003	1634.024057	261.566023	8.5347	.198	20.1258	.2115	0	41.9976	13.5153	6.156	1.3041	7.8696	50.5323	13.7133	1.5156	7.8696	26.2818	1.358415994	.661022	785	2923.851064	168.352958
P-13	27.503894	3001	17.6886802039	31.22577	353.455246	7173.493934	7526.94918	2443	758673	92.2025689999999	621297	645791.443858999	88290	3344.528571	90.501506	528.969374	1350.659817	3360.549798	319.972827	6.3549	.7119	16.8651	.378	0	17.1135	43.0452	6.0183	2.1132	7.4061	23.4684	43.7571	2.4912	7.4061	22.8834	1.438296683	.709471	545	5998.438356	164.326886
N-12	27.776764	2382	19.2938382598	35.354321	2199.663293	6240.741978	8440.405271	2159	673317	84.4572469999999	564210	481308.956584999	106416	1819.646341	118.402597	487.411826	1789.260402	1923.528969	656.941179	5.3253	.7263	26.3493	.3474	.0063	9.3969	40.8465	7.2252	2.4444	7.1703	14.7222	41.5728	2.7918	7.1766	33.5745	1.462322093	.702835	379	3552.846154	283.961273
J-14	26.647645	1663	13.1398351861	31.632482	0	3711.571833	3711.571833	0	870336	94.9019689999999	799173	784076.951666999	42372	2625.146341	69.844011	30.13667	57415.234216	10139.2593	321.003503	4.3101	.2169	8.8992	.0144	.0018	6.5025	71.622	2.5245	.1458	5.7249	10.8126	71.8389	.1602	5.7267	11.4237	1.113005836	.708853	200	13643.83019	213.280132
N-19	29.697262	299	16.2103630654	32.000497	0	2445.899162	2445.899162	271	936603	99.9192829999999	886968	935091.679754	13788	4723.714286	77.090909	25.314909	25961.257688	31085.736824	199.088322	1.0962	3.0564	2.3976	0	0	5.5323	80.7849	1.5426	.3294	5.1984	6.6285	83.8413	.3294	5.1984	3.9402	1.163603656	.753148	91	76446	154.956527
R-2	26.946965	0	18.5892757415	31.567077	0	0	0	0	971694	99.99259	924147	971550.010669999	6966	67.5	507.584071	38.307522	1487.735834	72021.93474	2672.364876	0	.9018	2.1276	.0009	.0054	.0405	85.5324	5.6322	.5076	5.0508	.0405	86.4342	.5085	5.0562	7.7598	1.345931436	.748378	19	86560.2	367.920289
J-15	27.520423	3079	13.1919586038	31.193069	0	7690.916266	7690.916266	489	723420	91.305051	593595	603489.355013999	89703	2011.017857	73.533728	1186.795137	2075.925088	5246.637893	241.720219	8.7399	.4527	18.0612	.8613	0	13.8609	45.099	6.2019	2.5812	4.1004	22.6008	45.5517	3.4425	4.1004	24.2631	1.46994267	.714243	531	6848.597015	171.561968
P-19	27.784535	2754	20.8083409897	30.770881	2915.300901	9563.490978	12478.791879	1483	597465	44.5070419999999	428697	138296.453461	81873	1647.421875	221.010043	28.744636	10123.911053	1343.753264	732.95429	7.7949	1.8342	30.7242	0	.0045	13.2399	26.739	15.3918	.1782	4.0374	21.0348	28.5732	.1782	4.0419	46.116	1.368428875	.667396	406	2605.745455	205.920607
K-11	28.233683	4662	17.5883360431	30.96813	0	13738.686269	13738.686269	4151	512091	64.90448	349056	218106.319672	192519	2021.213415	108.275061	227.146101	35506.376836	1000.868607	504.210675	11.403	.5463	35.8974	.8118	0	21.5064	16.5735	8.8551	.7749	3.5928	32.9094	17.1198	1.5867	3.5928	44.7525	1.294419097	.667378	753	1352.214286	258.747524
G-11	27.082614	2280	15.386310846	30.257707	926.967601	6702.22556	7629.193161	521	764766	89.809824	641952	617713.005202	63774	2990.892857	348.297872	113.726527	1855.663371	3776.312349	492.880621	7.3845	1.6344	14.4162	.2655	.0036	9.1476	47.0898	14.6664	1.8387	3.3363	16.5321	48.7242	2.1042	3.3399	29.0826	1.49946322	.673683	466	7393.227273	140.330128
L-13	28.186376	3684	16.7977217726	30.817916	0	9536.305739	9536.305739	2897	652086	85.851713	515862	481184.790571	116559	3242.783505	75.069065	526.027017	1783.244126	7056.860467	268.244495	11.2635	1.9494	21.0294	.8739	.0027	20.2113	34.7238	5.2128	2.1843	2.6775	31.4748	36.6732	3.0582	2.6802	26.2422	1.369614338	.676493	672	10231.5	176.540987
F-14	27.163591	1538	12.9557686121	31.527447	1255.225696	4323.601819	5578.827515	1380	640044	55.933967	523692	238428.003036999	89046	4489.03125	106.832813	327.912793	685.480419	2938.493858	841.652949	4.6764	1.8855	28.3266	1.1772	.0234	9.7308	43.3989	6.759	1.2591	2.4975	14.4072	45.2844	2.4363	2.5209	35.0856	1.363588934	.689818	286	4575.727273	315.081462
G-10	27.543986	2907	16.5731496145	30.080745	1508.106546	8044.109789	9552.216335	2368	710550	48.583914	567657	256516.702951	78948	3256.411765	251.124224	279.157567	2123.018597	4894.302027	423.62198	7.8399	3.6576	17.1936	.4995	.0216	14.2488	39.3813	12.132	2.5056	2.4849	22.0887	43.0389	3.0051	2.5065	29.3256	1.304954166	.688224	588	7082.409836	137.410731
J-19	28.340025	3331	14.1658640709	30.683996	0	12382.130739	12382.130739	3031	641889	95.7067339999999	413082	588037.321252	159840	4872	69.206087	1560.490209	1164.817888	1043.576333	347.845474	8.3862	1.2186	24.8202	1.4535	0	42.4116	7.9884	7.911	3.4047	2.0043	50.7978	9.207	4.8582	2.0043	32.7312	1.326628799	.660473	827	1350	196.870649
G-13	28.899606	0	12.8879879817	32.116912	160.513199	0	160.513199	0	354582	24.935276	279549	48660.414082	70533	891	107.44898	42.248047	8997.642333	2166.764488	4781.646975	.0117	15.2856	49.4838	.0036	0	.1665	29.8539	3.1518	.3384	1.8558	.1782	45.1395	.342	1.8558	52.6356	1.026666282	.641386	104	3901.810345	681.386023
J-5	27.43357	2142	21.0213764368	31.958729	2804.584547	7601.1963	10405.780847	1210	605790	69.826177	475551	302441.356143	128232	2565.3	105.779221	106.53871	8759.693578	2131.20033	619.06447	6.4098	1.4454	31.7277	.0963	0	16.7391	33.8976	7.2414	.6687	1.7217	23.1489	35.343	.765	1.7217	38.9691	1.339667557	.662704	515	3549.87	251.070104
I-4	27.45192	1564	19.9315301101	31.122589	3244.140008	6079.486532	9323.62654	1501	777366	53.4559009999999	658323	326304.458679999	61704	2695.05	116.042254	208.841663	2780.4405	7719.838658	424.101175	4.0752	.7317	16.5618	.9855	0	11.9484	55.5912	7.4664	.7344	1.6866	16.0236	56.3229	1.7199	1.6866	24.0282	1.390318634	.719669	348	11748.375	180.728564
F-12	27.793421	2987	15.3521025743	32.423329	940.364268	8679.522087	9619.886355	3016	480906	40.3282549999999	368739	96294.534379	149850	2635.105263	175.14882	471.030047	1283.43629	1890.825573	535.316901	11.7738	5.6835	34.0011	.5958	0	8.01	26.0802	9.6795	2.5416	1.5678	19.7838	31.7637	3.1374	1.5678	43.6806	1.329413863	.674153	624	4080.923077	244.372794
M-7	28.375144	1882	22.695754962	31.438669	5418.050549	4653.792416	10071.842965	1073	426780	36.649093	293202	78722.7024039999	169605	1648.539474	246.105166	600.085766	6465.59063	1438.673724	3513.414287	3.2922	5.2461	43.9902	4.6377	0	9.1998	17.118	13.3848	1.6839	1.3059	12.492	22.3641	6.3216	1.3059	57.375	1.200815698	.664498	237	1922.974138	717.341219
L-10	29.480015	774	20.4715703906	35.324803	3547.235214	8176.108809	11723.344023	844	379872	50.6894429999999	278523	106086.952853	136323	1233.272727	194.211499	1759.711219	1182.272727	851.502465	3695.915585	2.6631	5.6601	52.7202	.999	0	1.4067	22.2174	9.4275	3.5667	1.3005	4.0698	27.8775	4.5657	1.3005	62.1477	1.079790424	.654318	160	1991.7	855.993302
S-6	30.102708	2095	22.7747170532	32.539218	1537.24841	14019.874904	15557.123314	1989	196911	68.1292559999999	149886	96486.053887	290151	332.735294	109.613208	187.337328	2530.945714	524.265182	9785.346314	.8388	1.5291	75.852	1.89	.0018	.2655	13.9509	3.5055	.5913	1.2654	1.1043	15.48	2.4813	1.2672	79.3575	.726756662	.685298	301	944.618182	1043.460472
S-15	26.055595	414	20.1692030834	28.780042	11.292321	2521.041852	2532.334173	401	944523	99.698896	893088	938844.637093	21402	2303.307692	215.151832	54.601715	340.534541	19689.376407	473.823547	1.1061	1.287	3.3921	.063	0	4.9383	83.277	4.1004	.5652	1.152	6.0444	84.564	.6282	1.152	7.4925	1.355494388	.761031	117	33957.72	184.093856
I-11	27.878533	2748	15.3480242292	30.439419	0	9030.113322	9030.113322	2784	735552	92.648786	597294	631803.171274999	95454	2472.12	137.496466	410.621444	676.058824	5537.666676	410.265372	6.9372	.7092	17.5266	1.3239	0	17.577	43.6041	7.7463	3.3912	1.1493	24.5142	44.3133	4.7151	1.1493	25.2729	1.385942929	.705654	529	8039.945455	183.134197
W-6	28.181189	5102	18.5876551026	31.284309	0	13420.619515	13420.619515	4369	576558	35.3797879999999	423828	99556.311323	119115	1533.402985	69.800847	375.803131	1890.450051	1874.263584	374.73419	13.0095	.5166	27.7947	1.2699	0	17.7147	30.9582	4.9131	2.5245	1.1358	30.7242	31.4748	3.7944	1.1358	32.7078	1.353052963	.698511	762	3077.825243	163.674527
O-5	28.004545	759	18.6375111695	31.564746	0	4123.843987	4123.843987	536	544734	51.752966	458046	174923.850708999	115065	1489.5	285.605769	24.1884	107.653014	2640.543133	1802.630641	1.9368	7.6986	35.0163	.0009	0	1.6407	42.2343	8.8983	.0594	.9351	3.5775	49.9329	.0603	.9351	43.9146	1.372005716	.703356	158	5625.202247	734.403108
R-19	28.127837	3921	18.0750314012	30.132905	0	12285.147477	12285.147477	1456	530064	41.2931269999999	333522	128286.086490999	143118	4133.454545	121.851485	367.285954	7625.254905	676.296333	478.164218	11.5254	.7083	33.5421	.3339	0	20.1609	18.9909	11.0286	1.1295	.801	31.6863	19.6992	1.4634	.801	44.5707	1.277479385	.637755	712	1272.716129	204.371325
Q-13	28.318853	3216	17.6313069834	31.087698	1065.792312	8206.022079	9271.814391	2394	689931	43.282589	510291	229020.127852	95355	5517.490909	153.928826	1193.410038	7940.1168	2705.793485	359.637885	8.0316	2.7801	19.8909	.6795	0	22.2777	34.8696	8.6301	2.1915	.7911	30.3093	37.6497	2.871	.7911	28.521	1.459442853	.675854	673	6101.564516	144.254191
I-8	27.675274	2855	18.85673033	30.651135	3760.177812	6137.915238	9898.09305	2848	608031	53.372608	479115	199217.820734	79533	1665.236842	121.255435	1742.387108	4050.688901	4081.041203	589.798768	8.1387	1.5642	27.8064	1.2105	0	10.8612	36.3546	6.6933	3.6	.7857	18.9999	37.9188	4.8105	.7857	34.4997	1.360902991	.685324	401	5950.96875	201.734875
T-6	28.145326	2751	21.0683336818	31.342781	2992.027129	8879.902008	11871.929137	2029	618183	23.91719	480861	91893.442267	79830	255	150.758893	200.421323	3848.181198	1714.714059	982.349753	4.2192	2.6694	30.0519	1.143	.0009	3.2778	43.2549	11.4021	1.9296	.7677	7.497	45.9243	3.0726	.7686	41.454	1.380604953	.697768	301	2477.274194	285.073686
J-9	26.758523	764	19.4670741395	32.367664	1077.11588	2840.447515	3917.563395	344	593685	63.5928139999999	487260	267160.592571999	69660	2457.375	305.108696	89.052477	873.204944	3677.058437	823.188221	2.1483	19.3329	16.7373	.1755	0	3.564	40.2741	12.6387	.2169	.6939	5.7123	59.607	.3924	.6939	29.376	1.470468469	.683514	164	6357.829787	427.523697
O-14	29.37848	5357	18.6019913422	30.73809	760.659894	14477.268994	15237.928888	2643	489303	20.466459	269379	48037.4957789999	162387	4510.610526	111.097087	3311.006073	6709.865767	458.687751	337.677779	15.1695	.639	34.3656	.999	0	27.531	7.6887	10.2771	2.6289	.6642	42.7005	8.3277	3.6279	.6642	44.6427	1.196811217	.611552	932	749.756757	177.857327
O-17	29.542349	1356	17.7951027583	33.958902	0	8553.680867	8553.680867	298	432495	74.9370509999999	299790	245276.522797	205443	1867.040816	82.658505	1126.389812	6408.8478	830.018878	1362.198759	2.9331	1.4292	42.4035	10.2798	0	6.1272	24.5016	6.381	5.2731	.6354	9.0603	25.9308	15.5529	.6354	48.7845	1.156830262	.642045	345	1540.376471	597.842248
R-16	28.022827	2443	21.1640119561	31.898183	853.325295	7478.268838	8331.594133	2055	573354	50.0910429999999	449442	192734.616581999	139446	2500.815789	132.223101	633.904092	4713.209216	1358.060817	806.594648	6.0975	.8568	35.3349	.3438	0	12.6882	33.4269	8.3367	2.1294	.4734	18.7857	34.2837	2.4732	.4734	43.6716	1.372844771	.701887	461	2558.88806	305.067969
P-15	29.005226	4726	19.2640366734	32.277061	1004.050135	10297.299216	11301.349351	3085	585864	32.247757	388017	113657.451764	121869	5466.176471	113.776685	3341.53485	4559.712	2714.314411	363.618997	11.0934	2.0403	26.757	1.7073	0	26.0928	20.4309	8.0775	3.3237	.441	37.1862	22.4712	5.031	.441	34.8345	1.276352459	.640782	688	3775.5	179.685214
F-11	28.837655	5284	16.4815214534	30.571181	559.572824	13463.693345	14023.266169	2949	443754	35.6325799999999	286830	66990.283414	161901	3247.991379	65.55298	924.387097	137.429517	1325.397119	220.79267	21.2202	.4536	33.0444	1.0926	0	16.524	19.5516	5.8653	1.773	.4392	37.7442	20.0052	2.8656	.4392	38.9097	1.179409592	.63308	1051	2279.454545	156.87469
G-5	27.515631	1301	15.9902668934	29.894243	1812.436565	4636.462538	6448.899103	962	785268	86.161922	679599	585254.320039	73809	5457.6	100.844595	22.144451	3473.160562	14963.097683	321.651195	7.3908	.5265	13.59	0	0	14.1426	59.3955	4.4307	.1269	.3582	21.5334	59.922	.1269	.3582	18.0207	1.384691417	.711711	422	16619.25	178.628177
N-6	28.888681	5736	20.0933397066	31.795712	3100.098772	16766.137992	19866.236764	5394	427887	27.6928249999999	280458	50633.5223899999	175563	867.719243	80.363636	1904.850795	205.472849	1490.393573	516.815135	13.1706	.603	41.6664	1.9044	.0009	14.2452	16.9956	6.3405	4.7529	.2853	27.4158	17.5986	6.6573	.2862	48.0069	1.136024331	.66263	838	2715.784615	217.945445
N-8	28.753659	2240	23.2583429532	31.317031	1852.714288	8902.965275	10755.679563	1900	405504	40.6893639999999	294453	96258.534801	140787	398.890511	256.732759	999.523174	182.587517	687.277823	3531.467455	3.618	5.5737	48.1248	2.3094	0	1.8405	21.9663	14.8752	1.4724	.2844	5.4585	27.54	3.7818	.2844	63	1.213830901	.607911	263	1114.396761	536.495941
O-6	28.700081	2734	20.9709413437	32.214442	3376.479532	11274.95408	14651.433612	2500	481311	54.494287	341721	150953.080854	150273	1048.815287	135.517398	136.962146	234.330464	1470.701656	1094.522834	7.9029	1.5579	42.0813	.7011	0	8.4834	28.8351	8.8821	1.2636	.2574	16.3863	30.393	1.9647	.2574	50.9634	1.190637155	.685037	540	2378.790698	281.616549
M-17	29.041209	2489	15.4047729263	31.742024	1946.406645	8277.603336	10224.009981	1192	656037	67.378212	504711	308945.001674	112275	5865.051724	86.583012	291.928244	275.552162	2550.551638	296.376408	9.2304	.963	23.4225	1.0152	0	24.5736	30.9105	6.7149	2.889	.2304	33.804	31.8735	3.9042	.2304	30.1374	1.311870108	.669788	678	5001.609375	168.064039
L-4	28.538108	5480	19.5632982597	31.310129	937.211649	14293.392863	15230.604512	3429	419022	18.3190859999999	258759	38475.6035049999	183672	1333.356164	86.031646	1619.706789	1817.583626	705.39565	425.655776	15.4053	.9603	40.2957	1.6614	0	13.599	13.2273	8.1576	6.4638	.1683	29.0043	14.1876	8.1252	.1683	48.4533	1.184537327	.646368	859	1049.058394	216.667119
M-8	29.174801	0	22.6209707441	32.140131	1875.314205	3618.355466	5493.669671	0	182124	51.561573	125883	54393.2496539999	270360	117	270.651316	18	709.209234	431.803762	14663.078565	.009	4.968	76.9203	0	0	.0027	9.7335	8.1234	.0432	.1368	.0117	14.7015	.0432	.1368	85.0437	.72188648	.611084	181	827.898876	1495.060966
R-15	27.005841	1154	19.7717319715	30.095111	1099.452416	3244.480134	4343.93255	1063	845559	86.4322889999999	776502	637680.803812999	40725	657.1125	225.442623	22.396049	337.385423	6970.413453	807.518847	2.1393	1.4607	11.6955	.0036	0	3.1059	73.7901	6.885	.2736	.0369	5.2452	75.2508	.2772	.0369	18.5805	1.326677151	.75587	166	15396.61225	248.689038
J-8	29.534713	5382	20.6378656429	30.993972	1109.083524	15649.36436	16758.447884	4572	345447	12.5081419999999	182934	14288.309538	206775	1043.148649	93.565217	925.651305	135.113828	239.496706	553.639758	15.4863	1.4886	45.4464	3.3651	0	15.4224	8.7894	7.7463	2.376	.0225	30.9087	10.278	5.7411	.0225	53.1927	1.049652502	.613327	807	473.986425	259.212608
S-14	27.688293	5941	18.9508332026	30.444095	1296.276608	13643.69926	14939.975868	5094	543942	74.833714	343242	307356.895265	179793	1892.152174	83.053636	486.825976	144.440173	961.971379	487.714878	11.2329	.3213	33.2712	.5859	0	32.2578	10.8315	9.1017	1.8567	.0171	43.4907	11.1528	2.4426	.0171	42.3729	1.247804733	.667383	850	1401.975	215.201335
M-11	28.132851	5623	19.0799745966	31.129889	570.189152	12965.517157	13535.706309	3845	519138	47.078811	359919	126295.335807	172818	3202.15748	65.597074	619.772727	15	4390.877946	308.933485	15.651	.1062	31.7223	.5481	0	24.8058	21.3885	4.923	.8154	.0045	40.4568	21.4947	1.3635	.0045	36.6453	1.223415336	.663835	981	4970.72093	179.771586
K-8	28.187268	3253	20.7247181085	30.580585	0	9950.16069	9950.16069	2474	436887	61.9182989999999	309942	174663.228416	153360	1320.284483	226.426667	544.534151	18	438.543672	902.656463	7.4907	2.8206	43.2207	.5013	0	7.5816	17.4438	15.2667	2.6568	.0018	15.0723	20.2644	3.1581	.0018	58.4874	1.285112922	.647103	463	923.630137	334.595913
K-17	29.458112	3470	15.5731024327	31.146218	2639.860243	13001.028295	15640.888538	2941	312273	52.7048449999999	170289	93979.3812429999	251811	607.602606	92.760157	2202.742685	9	312.80828	1653.410857	6.8598	3.8718	54.6246	3.4857	0	11.646	6.264	7.0236	5.9877	.0009	18.5058	10.1358	9.4734	.0009	61.6482	.963468006	.63481	518	517.954545	489.218076
R-12	29.095575	4122	18.1538127816	32.19362	1536.61805	7801.511178	9338.129228	3404	588024	48.3852699999999	441882	184442.522376999	138096	3145.344828	108.099842	2403.174989	9	4870.963246	456.160814	9.7848	2.0592	25.254	4.365	0	17.3727	25.6869	6.8139	8.6229	.0009	27.1575	27.7461	12.9879	.0009	32.0679	1.3216782	.68388	615	5581.98	227.444028
T-7	29.498451	3263	23.5931189702	31.19311	2018.871022	14315.856627	16334.727649	2760	392607	12.229787	249615	20318.666598	120528	1153.702703	112.594186	343.429861	12.977259	720.933082	872.197093	7.4943	5.3019	46.6785	1.1385	.0036	5.3082	21.96	9.5823	1.9872	.0009	12.8025	27.2619	3.1257	.0045	56.2608	1.13033252	.616118	339	1483.297297	359.544174
E-13	28.100351	1881	13.9353528192	31.256321	1082.324268	8779.998858	9862.323126	1798	464796	34.7358839999999	341757	88242.477616	137853	1243.51145	249.01049	676.889525	0	753.869255	783.082801	9.4383	4.6251	38.6946	.9072	0	6.6618	19.7802	14.2704	5.7069	0	16.1001	24.4053	6.6141	0	52.965	1.315735502	.643113	564	1671.226027	247.823054
E-14	28.603932	4909	12.8160652883	31.064304	1133.025745	11927.429246	13060.454991	3760	499761	30.8739579999999	315549	65013.4795329999	136620	3887.821782	88.251799	2567.697481	0	502.586622	353.194833	18.1782	1.6623	28.5093	1.9359	0	21.0708	10.0746	8.4321	10.1016	0	39.249	11.7369	12.0375	0	36.9414	1.293951754	.623517	703	744.835443	196.969375
F-3	28.50279	3965	16.2153354358	30.637065	1936.983123	12161.618919	14098.602042	3048	482580	40.911973	330480	96515.1567329999	152613	1552.664921	65.793396	1187.542025	0	1410.095772	413.662631	15.5808	2.16	33.0102	1.1124	0	14.0301	21.1329	6.9858	6.0318	0	29.6109	23.2929	7.1442	0	39.996	1.224663536	.648127	787	2154.333333	196.4224
G-2	28.287666	4375	18.294403446	30.782457	752.176857	12796.055903	13548.23276	3900	490545	42.230988	351639	96003.172718	161910	1903.333333	70.867704	2108.867884	0	1743.633064	490.680782	15.5421	.6057	34.1622	.945	0	15.1605	25.3962	5.4495	2.8791	0	30.7026	26.0019	3.8241	0	39.6117	1.242967275	.645668	735	2348.837838	222.729528
G-3	29.148909	3548	16.7047134384	35.401957	1526.023643	12137.28252	13663.306163	2403	448821	55.2146619999999	295551	143387.947481999	184662	1848.731707	74.87667	3015.179678	0	826.677352	440.616518	13.5351	.8451	37.2879	3.4443	0	16.668	11.484	7.2711	9.1602	0	30.2031	12.3291	12.6045	0	44.559	1.177582223	.636189	760	1153.682243	246.09816
H-11	29.315867	5179	15.6317869824	31.891104	0	15036.967874	15036.967874	3832	522243	29.2898129999999	314739	98339.53289	176400	4495.9	97.404941	6846.383962	0	1293.379217	342.460347	14.7105	.7902	29.6604	2.5425	0	25.6491	10.3068	9.0369	7.0218	0	40.3596	11.097	9.5643	0	38.6973	1.202386006	.625271	851	1863.6	210.460224
H-4	28.125801	4042	17.5385634467	30.23908	2104.373977	10272.151517	12376.525494	3379	522783	47.714635	369945	141690.096941	148527	1564.492147	101.120192	2403.088848	0	2197.534352	416.185348	12.6225	2.754	30.2022	2.1987	0	17.2719	17.874	8.388	8.6166	0	29.8944	20.628	10.8153	0	38.5902	1.306423931	.647151	788	2839.068493	192.109995
H-5	26.724102	1620	18.0539456539	29.678865	2455.177873	4898.366744	7353.544617	874	765801	86.5176459999999	645957	577709.764446999	79344	4847.2	86.293245	120.419523	27	6205.242854	353.662913	5.8176	.9954	15.8274	.1269	.0027	15.8742	53.0028	5.2362	1.215	0	21.6918	53.9982	1.3419	.0027	21.0636	1.409201998	.708498	404	14211.71053	199.687002
I-10	29.09091	3070	16.3351843347	31.716414	0	9051.575735	9051.575735	2665	669033	83.1241509999999	532935	463773.304854999	127422	5131.963636	82.8144	683.593428	0	9044.379149	309.204048	9.4041	.8271	20.8215	2.2131	0	18.6813	39.834	5.1795	3.0042	0	28.0854	40.6611	5.2173	0	26.001	1.350123402	.69107	599	10467.46154	216.119785
I-5	25.010182	471	20.3371110471	28.31176	3114.460008	3775.292543	6889.752551	208	835470	58.3151999999999	719046	408396.408035999	45873	2144.25	189.17341	281.44653	0	4276.867047	533.17411	2.2221	.5211	13.0599	.8253	0	10.5417	56.331	9.7794	6.6798	0	12.7638	56.8521	7.5051	0	22.8393	1.4144501	.73849	237	7596.12	195.90676
J-10	28.0341	2353	18.3045382576	30.517036	762.545287	8264.269654	9026.814941	2245	454230	51.59897	310680	139628.244738999	108990	3429.519231	109.437604	1047.891362	0	2085.391258	849.061345	6.5412	8.9298	38.5146	.5931	0	11.3256	26.2764	6.5763	1.1916	0	17.8668	35.2062	1.7847	0	45.0909	1.201508596	.645895	418	3931.6	263.944011
J-11	29.147365	5106	16.9291152205	32.49987	0	14742.443848	14742.443848	4078	481518	47.88606	293220	129198.303465	211806	2791.933333	113.283063	1923.106867	0	1266.906481	465.212295	13.563	2.0016	33.0498	3.3624	0	24.0318	9.1512	9.7245	5.0805	0	37.5948	11.1528	8.4429	0	42.7743	1.191008002	.636619	813	1553.5	263.353669
J-17	28.773198	2430	14.6673083522	32.374617	0	10863.02426	10863.02426	2212	518184	90.53425	344880	425018.864630999	189171	3868.935484	115.463115	235.094946	0	1004.746854	532.436918	8.2818	.9477	37.4589	.2646	0	27.5166	15.2676	8.4141	.3492	0	35.7984	16.2153	.6138	0	45.873	1.304967916	.658972	719	1499.333333	266.583327
J-18	27.345922	1682	14.4186710772	32.23756	1134.896144	8712.938206	9847.83435	1322	743094	99.371412	537174	733782.665140999	112104	5409.511364	130.28625	679.502735	0	1471.636312	437.616175	5.1822	1.4085	17.1684	2.2779	0	42.4134	18.7047	10.4238	2.5488	0	47.5956	20.1132	4.8267	0	27.5922	1.343011331	.708259	503	2571.379747	225.525899
J-6	26.773156	1056	20.3508771963	29.294358	1051.867323	4018.851671	5070.718994	741	872469	97.0693509999999	770139	822252.793256	51426	3564.9375	123.951724	177.617389	0	10282.729546	321.34372	3.582	.1539	8.901	.3429	0	13.4262	65.6892	5.3505	2.4984	0	17.0082	65.8431	2.8413	0	14.2515	1.39303976	.743212	283	18309.5	185.042831
J-7	28.677475	5161	20.9667827185	30.222561	1315.945118	14400.400358	15716.345476	2647	386784	20.639427	224658	34773.3399569999	172935	1939.570681	103.780842	226.295644	0	486.951714	382.701814	18.8154	.6498	39.8151	.5616	0	17.9001	11.3283	7.1064	1.2654	0	36.7155	11.9781	1.827	0	46.9215	1.143374857	.627375	920	912.425373	191.15369
K-10	28.473915	4966	19.1921171077	29.891744	0	14592.57085	14592.57085	4190	557964	71.811085	368235	290365.182173	171081	4435.056818	118.751678	1619.2817	0	5516.239777	390.548681	14.4405	1.3419	27.9162	.612	0	24.6384	19.5759	8.8038	2.6343	0	39.0789	20.9178	3.2463	0	36.72	1.247883089	.64213	763	6017.4	228.003355
K-13	28.966849	5403	14.8181353283	31.237542	1436.009056	13648.183052	15084.192108	3304	469548	14.2931069999999	269100	25336.6246649999	180504	4919.257426	70.761092	796.730329	0	869.482067	289.958956	18.8514	.2178	32.5782	1.5336	0	30.9096	8.073	6.1758	1.8126	0	49.761	8.2908	3.3462	0	38.754	1.154067647	.626185	1044	1011.073171	176.260335
K-14	28.966735	4010	14.5877672006	32.562413	0	12800.740218	12800.740218	440	579159	71.106898	353790	302073.808285999	167724	7420.056338	73.959813	717.793268	0	993.693259	281.693489	13.3281	.2574	28.0287	.657	0	39.3606	9.0513	7.8543	1.4265	0	52.6887	9.3087	2.0835	0	35.883	1.265404485	.643229	964	1162.888889	177.345941
K-15	29.079015	4297	15.1336266637	31.043204	1025.116385	11019.587525	12044.70391	3033	492156	39.161363	325755	92841.3420009999	166284	2509.912752	58.323347	1811.398639	0	1133.390748	272.562688	14.3469	1.6335	32.1165	1.8792	0	22.9347	17.9667	5.6502	2.3031	0	37.2816	19.6002	4.1823	0	37.7667	1.206721552	.654791	947	2585.723684	178.719701
K-16	29.459282	4701	15.7656084629	31.176686	1095.101673	11956.869033	13051.970706	3828	383643	61.697985	255294	148615.962066	193446	1050.329268	84.427362	314.171369	0	448.450413	751.122018	12.1437	1.7847	46.2555	1.4382	0	13.698	17.577	5.9949	1.0476	0	25.8417	19.3617	2.4858	0	52.2504	1.144518804	.661375	809	740.541985	242.691841
K-18	28.861739	4582	14.8469029855	31.335828	946.440827	13165.758345	14112.199172	2950	491400	61.230769	285786	198289.032198	202689	1497.48913	78.700667	2027.428356	0	327.774033	605.394523	11.0088	.5913	37.1286	2.2959	0	30.2418	3.5829	8.2431	7.0479	0	41.2506	4.1742	9.3438	0	45.3717	1.215494559	.643413	801	447.870968	255.578577
K-4	29.088613	4384	20.3914811339	31.167313	1093.121937	12681.971603	13775.09354	3874	422064	36.559621	260973	67888.88498	200745	1320.136364	86.526316	456.579147	0	1062.664968	685.227754	11.8746	2.5749	42.2748	1.1322	0	14.2704	19.7937	6.8688	1.1691	0	26.145	22.3686	2.3013	0	49.1436	1.138696672	.642488	744	1743.697674	273.271453
K-5	28.637566	4813	19.7087017386	31.223493	2352.135878	14593.178288	16945.314166	4159	445104	22.514963	268677	48048.2750319999	174267	2647.459459	55.427466	6411.014762	0	666.337775	295.60082	16.4502	.5085	36.2673	2.2509	0	22.6242	10.0341	5.7024	6.0786	0	39.0744	10.5426	8.3295	0	41.9697	1.167685967	.631554	1026	927.39823	172.963192
K-6	27.950551	3838	20.055839753	30.222566	0	11996.978337	11996.978337	3144	631836	89.9179529999999	464886	511118.352345	136971	2437.65	75.155985	423.521739	0	2012.09806	240.314615	11.5263	1.1943	24.0084	.4905	0	22.5504	31.5153	6.2046	2.4318	0	34.0767	32.7096	2.9223	0	30.213	1.355788431	.685168	832	3251.205882	170.319691
K-7	29.429281	5971	21.1065001285	30.972843	1953.564477	14202.602038	16156.166515	3711	284508	26.575351	146034	28006.8833989999	234603	571.475275	101.695755	688.651144	0	447.698486	1052.515831	10.7235	2.2122	56.5011	1.3977	0	10.1673	8.658	8.6274	.8793	0	20.8908	10.8702	2.277	0	65.1285	.895375835	.61356	617	605.312849	382.877666
K-9	29.652817	1193	20.2487006143	34.158115	2207.635444	9993.228141	12200.863585	484	253206	17.4948459999999	149319	17552.158669	215982	3423.428571	208.944444	5.0823	0	367.34675	2677.822644	4.0158	2.1627	68.5629	0	0	3.2292	11.8368	10.1448	0	0	7.245	13.9995	0	0	78.7077	.829773467	.613068	269	660.013953	804.915705
L-11	28.857545	5864	19.407363537	30.904791	1117.186448	15567.83723	16685.023678	3939	418815	11.498872	229257	21884.12208	170667	3233.40458	103.225806	4175.273934	0	445.07529	339.188029	18.3771	1.2933	35.9505	2.6487	0	23.8149	2.7477	8.5869	6.5448	0	42.192	4.041	9.1935	0	44.5374	1.104104912	.614062	1069	575.112676	163.103194
L-14	29.222143	4722	16.1161761071	32.823977	1934.906912	11469.872981	13404.779893	2604	515961	75.7557259999999	298800	297129.099112	184212	2953.562874	65.34	2098.171229	0	250.609574	338.700242	13.824	.1269	32.2245	2.358	0	35.2305	3.4911	7.1802	5.4198	0	49.0545	3.618	7.7778	0	39.4047	1.216003134	.632324	994	411.545455	188.095821
L-15	28.907696	4645	15.8005860739	32.402455	935.373879	11344.001577	12279.375456	2831	540558	57.568846	333414	195067.842196	155979	9286.875	84.072	153.230533	0	379.944644	225.973145	18.2304	.5544	26.9451	.3411	0	33.6024	9.9603	9.4428	.8829	0	51.8328	10.5147	1.224	0	36.3879	1.303650716	.640213	1178	1008.085714	135.718518
L-16	28.930807	5512	15.9668169689	30.156509	0	12787.799217	12787.799217	3431	484182	59.5300939999999	291627	176830.952079999	173835	5094.835052	90.334337	2054.790412	0	248.952753	266.214461	18.5517	.72	31.7106	.7758	0	30.6702	6.2316	8.9649	2.2941	0	49.2219	6.9516	3.0699	0	40.6755	1.238661656	.632477	1163	635.645455	152.225869
L-17	29.408853	3666	15.8568259144	33.05719	1043.829836	10081.205956	11125.035792	2482	593109	82.9759789999999	426762	409137.573861	138672	5796.295082	57.355769	1050.141797	0	3542.617562	277.523484	11.6586	2.5047	24.3972	2.3157	0	23.4918	27.2493	5.3172	2.9286	0	35.1504	29.754	5.2443	0	29.7144	1.267824213	.667982	750	5429.945455	188.65496
L-18	29.424635	3312	15.1614936497	32.478882	694.032535	8721.26637	9415.298905	2792	656073	62.447014	532737	267971.384296	120312	1956.335664	66.457179	382.738823	0	2746.999955	349.394302	9.8919	.9387	23.31	.4455	0	18.0522	40.6233	5.247	1.6182	0	27.9441	41.562	2.0637	0	28.557	1.282390292	.695844	647	4116.831683	189.160647
L-19	27.471626	2181	14.6293410899	30.106939	75.016129	11435.486893	11510.503022	1095	707724	98.462536	456912	686134.963757	138276	14160.71739	80.347386	1168.40181	0	1468.882543	319.609531	8.6895	.1107	20.0286	.5373	0	56.2482	3.969	9.4959	.5148	0	64.9377	4.0797	1.0521	0	29.5245	1.334010442	.664916	785	1718.625	179.890178
L-5	29.56361	5440	19.1378505354	33.49959	1844.46243	14195.554302	16040.016732	3745	334098	17.6014219999999	179154	24205.798448	230139	735.946154	83.146067	2371.104398	0	369.950667	595.217412	13.9698	1.8243	47.5146	3.2715	0	14.6484	8.5374	6.606	3.5919	0	28.6182	10.3617	6.8634	0	54.1206	.998224719	.621181	863	526.938462	270.534554
L-6	27.699876	2243	19.3754442428	31.242251	773.881406	5510.922201	6284.803607	1263	767178	91.5651909999999	694341	644359.826353	68625	3550.615385	66.428571	1473.178449	0	14029.608101	229.840481	6.5943	.1431	13.3641	3.3516	0	7.1253	62.9694	1.9575	4.4586	0	13.7196	63.1125	7.8102	0	15.3216	1.408762684	.731127	444	21832.44828	173.90715
L-7	27.906427	3661	20.9226615882	30.64172	2437.478781	12590.570417	15028.049198	860	557469	67.0912639999999	343008	255339.251368	154332	4562.272727	113.035282	1661.986108	0	503.531315	451.675919	10.3473	.1233	32.2794	1.8594	0	34.5141	6.7203	11.1564	2.9583	0	44.8614	6.8436	4.8177	0	43.4358	1.248722061	.656071	811	749.73913	193.478832
L-8	28.595929	1732	22.0557294599	31.858616	2934.968399	7449.204203	10384.172602	1634	317178	36.638102	213741	52754.5999089999	168048	581.37931	228.219396	308.789348	0	422.762379	3852.466126	2.4066	4.4496	61.2891	.4221	0	2.5956	13.7556	14.2965	.684	0	5.0022	18.2052	1.1061	0	75.5856	1.046163457	.614329	301	711.55814	559.277768
L-9	30.192491	0	21.3079564563	35.134122	85.190847	5225.966852	5311.157699	0	171126	51.288524	97938	46838.5105709999	322866	0	165.409412	0	0	189.776514	36167.843728	0	5.6187	76.1634	0	0	0	10.0179	7.0074	0	0	0	15.6366	0	0	83.1708	.585332839	.586678	151	567.292419	2140.529284
M-10	29.096092	3774	19.9668885511	33.706422	995.195958	9676.332899	10671.528857	2362	310032	24.094287	174825	27627.857118	227475	3935.793103	123.138129	765.63395	0	334.762083	824.183506	11.9403	2.0601	54.5589	.522	0	10.9899	11.0169	8.5662	.3123	0	22.9302	13.077	.8343	0	63.1251	.935323472	.618012	657	807.804878	349.74904
M-13	29.597993	5067	17.9507763433	31.197797	1092.705151	15089.297807	16182.002958	3622	279387	9.612473	125388	9019.68704699999	257193	994.379195	89.702395	508.85633	0	83.913388	853.470886	12.9888	1.4058	55.755	1.9611	0	16.6338	2.3418	7.8705	1.044	0	29.6226	3.7476	3.0051	0	63.6255	.932770586	.599542	775	201.145161	334.205712
M-14	28.878902	4701	16.7631049873	33.315522	1185.388329	11567.619244	12753.007573	3638	541512	49.2886579999999	316035	158613.63931	167373	2040.121827	97.709336	328.78264	0	511.646535	396.807483	11.9169	2.3634	30.2058	1.4013	0	28.1754	14.0733	10.1376	1.6434	0	40.0923	16.4367	3.0447	0	40.3434	1.324956547	.646165	848	1265.884615	200.977107
M-15	28.747198	4789	16.1413768805	30.834437	0	11488.221426	11488.221426	2333	598428	84.073272	416232	423816.272875	145926	5255.164948	52.718919	2836.293824	0	693.470349	200.679476	14.3685	.1629	24.8625	.8226	0	36.387	14.6547	5.8464	2.8512	0	50.7555	14.8176	3.6738	0	30.7089	1.317432454	.666114	896	1474.11	165.805987
M-16	29.357192	4855	16.1373193687	31.394214	0	13869.237949	13869.237949	3681	521964	37.371543	321768	99798.341713	169461	5129.903226	67.922652	1333.333333	0	1411.565653	307.918139	15.5484	.7983	30.7971	.6777	0	32.0346	9.8109	7.3602	2.9268	0	47.583	10.6092	3.6045	0	38.1573	1.210022953	.635959	970	1767.75	177.852677
M-18	28.911034	3345	14.6346657956	31.662762	1594.496553	10055.666319	11650.162872	1771	662463	42.5000339999999	449226	169460.030636	141291	8490.661017	76.911642	322.734935	0	4022.072346	267.485745	10.89	.0729	22.6809	.2799	0	39.1743	18.0945	7.3926	1.5525	0	50.0643	18.1674	1.8324	0	30.0735	1.288121042	.666569	842	6259.965517	171.412233
M-19	27.725848	708	15.1056483836	32.376977	947.709955	7131.823973	8079.533928	533	742977	98.420409	543519	719714.329231	110088	8866.396552	98.476744	1178.433718	0	1387.991752	359.390337	5.2479	.8946	16.9245	2.5443	0	45.9261	12.78	8.4231	6.5313	0	51.174	13.6746	9.0756	0	25.3476	1.347081625	.695295	512	1717.291139	218.3827
M-5	28.349013	3980	19.1055506752	30.246171	2642.305392	12173.451515	14815.756907	2792	514530	29.8880529999999	347859	78953.776561	146529	3531.397959	90.09224	1945.74525	0	2151.906378	262.775484	16.1181	1.116	30.213	1.3662	0	18.5094	21.5955	6.1641	4.8708	0	34.6275	22.7115	6.237	0	36.3771	1.218514301	.66959	1032	2710.905882	145.223614
M-6	28.848295	5848	20.7181556207	30.314503	1248.166998	13997.669558	15245.836556	3992	488349	29.0245299999999	310986	74949.4388789999	165609	3659.336283	56.6018	7060.170888	0	2652.456138	310.486192	17.8614	.4212	31.8609	1.2438	0	23.1849	13.1112	5.0247	7.2576	0	41.0463	13.5324	8.5014	0	36.8856	1.184092078	.623523	1018	3168.418605	168.144708
M-9	30.561787	0	21.1070064984	35.372463	3054.327165	5850.012732	8904.339897	0	132705	32.1736179999999	66384	16876.611394	301311	387	185.886628	0	0	271.119464	15892.881753	.1818	5.5791	81.0189	0	0	.0108	6.8094	6.363	0	0	.1926	12.3885	0	0	87.3819	.467662771	.502261	165	718.179191	1826.018065
N-10	29.521785	577	20.8374130468	36.028605	0	6868.791807	6868.791807	220	195903	29.9122519999999	99882	21651.040796	246294	611.735294	181.732809	0	0	333.543414	3874.542363	1.4751	5.8365	71.3475	0	0	.6525	9.531	9.2745	0	0	2.1276	15.3675	0	0	80.622	.742670146	.577685	165	716.257009	1499.551092
N-11	29.301853	6363	19.982990145	31.546145	1478.433899	14535.259309	16013.693208	4414	355257	22.083449	209394	31687.040078	204705	1180.594937	150.021676	1358.664852	0	305.753141	667.411682	15.885	.9225	46.1763	1.5264	0	11.9889	10.4139	10.3644	2.6874	0	27.8739	11.3364	4.2138	0	56.5407	1.101229036	.629417	786	604.819149	264.194826
N-14	28.895843	5190	18.3614806471	31.986641	1658.401582	12489.340937	14147.742519	4622	547065	49.5813109999999	341649	161640.614313	161091	2529.542169	62.721311	1141.045486	0	963.281511	318.726602	13.6989	.2898	29.7216	1.4895	0	28.2087	14.2056	6.8688	4.9257	0	41.9076	14.4954	6.4152	0	36.5904	1.26428332	.656145	956	1217.025	171.487369
N-15	29.658801	5131	17.0680621829	32.240006	0	12576.759826	12576.759826	3354	554634	43.608217	383310	127396.546294999	156870	6061.808219	54.009667	7338.857143	0	3333.76101	218.943789	16.1802	.4878	27.0045	.9477	0	27.981	18.1656	5.0094	4.1895	0	44.1612	18.6534	5.1372	0	32.0139	1.246005414	.64449	1079	3819.489796	148.571894
N-16	29.152785	4671	16.763538141	32.562409	979.416827	11641.663676	12621.080503	2178	583299	87.9572909999999	366849	452059.483313	148806	3153.556452	91.943739	4618.567533	0	887.87681	327.354436	11.0673	.6165	29.5308	.6525	0	27.8973	17.0253	10.1052	3.0591	0	38.9646	17.6418	3.7116	0	39.636	1.324680444	.654589	741	1207.714286	204.05001
N-17	29.42504	5858	16.4875593986	31.571761	693.006773	13781.729079	14474.735852	2148	488610	45.728495	285489	116336.205157	164052	3692.491071	56.460646	630.079357	0	958.726645	292.728135	16.1289	.8019	33.9651	.531	0	24.9552	14.8194	6.7752	1.9881	0	41.0841	15.6213	2.5191	0	40.7403	1.193971364	.637616	916	1332.152542	181.979426
N-7	28.685731	4369	22.1870101606	32.476569	1209.256598	10981.137569	12190.394167	3303	554715	78.870771	397863	346615.874470999	128016	1873.730769	64.207154	2608.301968	0	3673.528764	414.329306	12.1482	1.6893	26.2233	3.8223	0	16.9047	26.9919	4.266	7.1064	0	29.0529	28.6812	10.9287	0	30.4893	1.280382512	.652632	706	4621.790323	185.583815
N-9	28.879681	0	21.8358188674	32.465069	1249.495005	5532.094694	6781.589699	0	202113	47.508572	132588	50422.614819	209169	556.5	383.745763	3761.010825	0	296.728169	34246.894775	.099	6.9867	72.1071	.7155	0	.2358	6.0228	13.5216	.0432	0	.3348	13.0095	.7587	0	85.6287	.741474624	.543889	150	578.418502	1396.687304
O-10	29.923713	4969	21.1265820169	32.967167	2318.965069	11451.980878	13770.945947	3027	332505	18.968737	186282	27123.607065	210303	2053.691729	93.576758	1852.659965	0	822.388713	533.476112	13.8825	5.5539	43.9632	3.4101	0	13.4505	10.1421	6.4827	3.0816	0	27.333	15.696	6.4917	0	50.4459	.98703916	.598888	673	1815.724138	315.585213
O-11	28.302842	3811	19.3878700071	30.422568	1037.452827	7477.981871	8515.434698	2971	662256	76.080398	513495	387176.694227	114849	3458.964706	72.744526	1683.229335	0	3704.225445	324.554444	10.3806	1.1034	20.8971	1.5219	0	18.8073	35.955	5.9265	5.373	0	29.1879	37.0584	6.8949	0	26.8236	1.347451248	.688071	717	6383.482759	163.01455
O-15	28.984434	4600	17.895197769	32.978801	0	11790.625055	11790.625055	2573	575298	39.2493979999999	383418	124779.755045	135675	2801.1	80.306972	1241.963983	0	983.792108	292.717943	11.6541	1.3212	27.7983	1.7757	0	21.6783	23.3604	7.6725	4.6899	0	33.3324	24.6816	6.4656	0	35.4708	1.330563679	.650322	752	1572.403846	184.419739
O-16	29.853455	3194	17.8909555794	31.758364	898.751522	8860.845947	9759.597469	2888	365463	21.907553	215199	33113.3360499999	210681	1847.883495	121.278082	2161.200654	0	582.98647	1123.621213	6.9237	1.3995	52.5879	1.9503	0	12.051	12.3363	8.8227	2.3643	0	18.9747	13.7358	4.3146	0	61.4106	1.052710684	.617282	458	795.651429	463.494015
O-7	30.482678	7305	22.7184156807	32.488234	2478.730498	18141.009327	20619.739825	5967	265104	15.9254479999999	155484	15310.934071	216603	341.683841	100.461305	2461.85394	0	762.107708	1773.341407	9.7227	3.1509	57.5145	2.3346	0	4.7475	12.2742	6.6294	2.5857	0	14.4702	15.4251	4.9203	0	64.1439	.867570493	.59022	474	962.832298	459.796925
O-8	28.303259	2312	22.3477062418	33.209457	1611.734833	6906.459209	8518.194042	9	234855	14.861084	131751	16106.831462	272655	302.8	201.290749	871.123708	0	146.509456	15422.04519	1.7082	3.5838	69.8211	.5733	0	1.0188	8.0568	13.6674	.3042	0	2.727	11.6406	.8775	0	83.4885	.851427868	.560256	283	214.173913	966.127209
O-9	27.942962	718	21.6044852951	31.681423	1193.86902	4569.389437	5763.258457	0	305586	52.462155	223191	89789.4603289999	163062	301.22449	527.840194	1239.725305	0	384.980856	12124.315006	1.0197	12.7998	54.6336	.6012	0	.5022	7.1874	21.753	.756	0	1.5219	19.9872	1.3572	0	76.3866	.652433896	.570466	140	576.440922	1170.590889
P-10	29.067719	2419	21.5107876217	31.303093	4889.233286	6712.700122	11601.933408	1750	316746	20.219356	186669	26281.162528	167427	1057.714286	179.64557	584.144763	0	363.097103	2960.541548	4.5261	2.5461	60.7185	.5328	0	4.437	14.2191	12.7251	.2358	0	8.9631	16.7652	.7686	0	73.4436	1.037086793	.622229	312	609.456522	540.98934
P-11	29.267358	6732	19.9934589862	31.045505	0	15359.406018	15359.406018	4224	427176	20.9295469999999	237510	37119.294413	196515	4702.193182	68.275325	1331.292979	0	1049.195756	340.162762	17.5869	.4455	37.4121	1.8648	0	23.7483	8.5383	7.8579	2.3949	0	41.3352	8.9838	4.2597	0	45.27	1.124845425	.62026	1030	1357.791045	194.131896
P-12	29.036514	8034	18.2972617545	30.782684	2291.057286	14981.934075	17272.991361	5404	342162	26.647904	163251	30854.00605	240975	1266.34375	72.771883	852.237938	0	303.513661	666.557192	14.9778	.4356	48.7953	1.7397	0	21.2967	2.9295	8.1738	1.5804	0	36.2745	3.3651	3.3201	0	56.9691	.984862205	.628252	959	398.964706	255.119265
P-16	27.797571	1652	19.3365898085	31.601941	932.893861	4571.90168	5504.795541	1192	837873	90.184431	730233	683795.328087999	43596	3695.558824	122.943038	47.442969	0	10754.027118	303.480997	4.3578	1.3392	10.683	.0378	0	8.2206	68.5359	5.8167	.9684	0	12.5784	69.8751	1.0062	0	16.4997	1.393498991	.733015	298	15242.67391	150.218102
P-17	28.440211	4827	19.6701152185	30.648813	857.704272	13676.470143	14534.174415	3079	555066	47.762428	340875	152364.885203	145368	3347.129032	138.768879	365.305564	0	936.43039	435.801613	10.9278	1.6272	31.1193	.9954	0	19.9863	21.1455	12.0897	2.025	0	30.9141	22.7727	3.0204	0	43.209	1.298393985	.641223	726	1608.401408	203.434769
P-18	28.36324	4578	19.8210331145	31.702438	1976.567103	12063.970416	14040.537519	3774	547092	24.85688	347004	69764.5141799999	127071	3061.03125	131.732274	2472.491122	0	1228.89221	404.744839	9.6642	1.3131	30.3345	4.0761	0	19.6668	19.1574	10.7721	5.0706	0	29.331	20.4705	9.1467	0	41.1066	1.282793017	.648496	602	1889.666667	213.343715
P-20	28.945989	0	21.8421677273	33.352284	971.035126	5895.581429	6866.616555	0	103257	13.858625	60705	7252.94334499999	137493	0	688.307143	0	0	502.426988	992930.140772	0	.0171	89.6985	0	0	0	.6885	9.5562	0	0	0	.7056	0	0	99.2547	.438390776	.585446	48	1759.5	2869.257293
P-6	29.184272	3986	19.5457920574	31.511057	1041.604197	10965.678192	12007.282389	3582	456732	43.5031919999999	348957	104897.559469999	111573	302.025641	205.864865	1869.392503	9	1601.558928	1455.061756	6.3999	3.5253	35.0037	2.7081	.0009	4.1139	25.0938	9.126	3.276	0	10.5138	28.6191	5.9841	.0009	44.1297	1.283563569	.647994	302	2485.318966	399.625486
P-7	29.622382	4084	21.8346665468	32.474342	2952.148598	10562.10494	13514.253538	2264	303732	20.0900789999999	170577	18244.953716	185301	681.222222	124.192308	2151.03113	0	370.448174	1956.337597	2.9025	3.9906	55.0251	7.4718	0	2.6127	13.3425	8.6535	5.661	0	5.5152	17.3331	13.1328	0	63.6786	.930691493	.606529	293	705.878049	636.207167
P-8	29.826368	3340	22.7401261557	31.179037	4036.267756	11821.744865	15858.012621	2446	270306	20.80309	140436	16301.78864	159264	976.585987	121.331551	1243.128199	0	350.180263	1858.265466	10.4607	2.5146	58.302	1.8693	0	4.8942	11.754	9.0864	1.2699	0	15.3549	14.2686	3.1392	0	67.3884	.875008975	.58203	430	586.763265	372.495003
P-9	28.649384	3107	22.2802832503	31.504042	2051.133904	8657.463393	10708.597297	2495	382113	27.1474669999999	264168	45462.146195	161019	596.544828	274.371835	1558.758554	0	191.544896	3036.78646	5.4045	2.9268	50.9616	1.1727	0	3.2031	13.8411	17.3448	3.3156	0	8.6076	16.7679	4.4883	0	68.3064	.954624465	.602756	263	401.746988	615.639669
Q-10	29.472342	9615	20.5193604459	31.777028	0	19595.935128	19595.935128	6014	335232	59.710588	159165	120530.055735	251010	910.994845	107.354214	508.716158	0	220.722806	498.99966	16.731	.3555	47.6712	1.8072	0	18.5598	2.5533	9.378	2.9088	0	35.2908	2.9088	4.716	0	57.0492	.958344475	.626464	962	474.428571	263.905481
Q-11	29.165701	7629	18.731255363	32.386276	795.682759	13271.171422	14066.854181	5677	471195	22.599561	306468	52310.627543	197469	2707.401316	108.665272	2764.983686	0	2922.837948	370.080251	15.9318	1.6677	35.001	.4356	0	24.993	12.6918	7.7463	1.4967	0	40.9248	14.3595	1.9323	0	42.7473	1.18709336	.644452	1032	3406.285714	194.762177
Q-12	28.961552	4773	17.5128327574	31.912188	340.034457	11249.165026	11589.199483	3904	532134	77.793187	375399	323806.971720999	142929	2044.328859	95.176692	1185.429105	0	1170.53221	421.372581	10.7928	1.3743	30.5667	4.2426	0	19.431	22.752	7.5717	3.2265	0	30.2238	24.1263	7.4691	0	38.1384	1.279353972	.657888	705	2686.1	206.67758
Q-15	27.884315	3420	20.6047099415	30.222389	2290.980483	10751.390443	13042.370926	1991	598158	42.767296	428742	177563.289067	125523	3531.662791	116.882507	667.351783	0	1864.639998	460.050424	9.1593	.4554	29.0439	1.7811	0	21.1644	23.5287	8.9577	5.8653	0	30.3237	23.9841	7.6464	0	38.0016	1.302419655	.686847	665	3026.025	191.316315
Q-16	27.990422	2739	21.0928763601	31.31714	5704.208746	8385.301837	14089.510583	1557	524889	20.282574	346149	45793.7476549999	129996	5721.6	124.549815	1031.017325	0	1355.087347	567.477187	8.4528	1.9467	35.9397	1.449	0	17.1603	22.6746	10.0755	2.2644	0	25.6131	24.6213	3.7134	0	46.0152	1.238621126	.679376	556	2317.794393	236.134803
Q-17	28.880715	7033	20.2732415286	31.005557	18.960003	15770.655991	15789.615994	3865	491688	25.203178	263169	58523.0508859999	146934	5498.470588	104.792974	3124.12627	0	496.080089	342.923198	16.3458	.7713	31.4829	2.5497	0	30.2121	5.742	8.2728	4.3308	0	46.5579	6.5133	6.8805	0	39.7557	1.217717791	.62079	975	571.769231	153.846393
Q-18	29.462055	4092	19.5915548734	32.962642	0	13807.558415	13807.558415	3497	436230	43.3876619999999	240147	90865.667052	179190	2951.608696	134.601136	1903.067323	0	570.134759	577.972234	9.1125	5.607	37.9377	2.772	0	17.982	10.2888	11.8431	3.1167	0	27.0945	15.8958	5.8887	0	49.7808	1.157668486	.615034	590	1032.735484	306.226514
Q-19	28.460946	3226	20.6243274582	30.439423	44.405778	10805.906583	10850.312361	1217	474669	36.519975	297657	98951.395973	128196	3285.25	186.909677	2703.524603	0	768.867199	887.071969	9.1584	1.6911	40.6314	1.0638	0	14.3982	14.5296	14.3676	3.5352	0	23.5566	16.2207	4.599	0	54.999	1.225303265	.628493	467	1269.28125	278.687786
Q-5	28.568381	4506	19.1127658581	32.063422	1689.913485	10401.006584	12090.920069	4241	537345	60.470647	401967	217140.804303999	131589	648.344681	127.517751	944.866017	0	1194.426403	1030.647532	7.2189	2.0997	28.728	1.0755	0	8.0577	21.7998	8.5905	2.5182	0	15.2766	23.8995	3.5937	0	37.3185	1.368421975	.661012	313	1925.419355	423.057903
Q-6	29.341817	4970	21.0434244297	31.384909	1081.235297	15776.591649	16857.826946	4369	440820	29.3752549999999	306729	56508.069212	158301	621	152.355372	1526.142857	0	774.069112	878.363416	12.8259	2.4525	39.4479	1.2411	0	8.2242	21.8322	11.0124	1.9638	0	21.0501	24.2847	3.2049	0	50.4603	1.265315186	.634292	530	1385.79661	318.667827
Q-7	28.162982	3231	23.3709752675	30.481713	2330.587021	9856.391715	12186.978736	1983	427140	57.667509	297144	146243.081416	141975	1004.009434	228.086149	919.506347	0	971.492675	1431.434893	5.3055	6.588	41.6043	3.3039	0	5.3163	21.6441	13.4874	2.0169	0	10.6218	28.2321	5.3208	0	55.0917	1.235451375	.608609	359	1526.935135	400.439672
Q-8	28.659584	5601	24.0631561598	31.38727	3479.163343	9393.018797	12872.18214	3066	257544	19.282919	137565	13520.734344	164574	453.474684	224.02994	372.976059	0	162.924663	3347.307494	4.3263	7.1667	59.2497	.4779	0	2.7405	7.2468	14.9454	.2673	0	7.0668	14.4135	.7452	0	74.1951	.91062384	.55216	241	358.311111	686.447407
Q-9	29.526392	5278	22.4581251757	32.167837	3303.590102	13410.697207	16714.287309	4939	364923	18.361408	228681	30415.300787	171225	403.42638	127.804511	713.020739	0	508.40273	1142.174092	8.3331	2.2005	50.2866	1.2276	0	4.8519	19.8954	10.0899	.8676	0	13.185	22.0959	2.0952	0	60.3765	1.098002394	.628602	394	869.743191	437.160144
R-10	29.729183	6701	21.8561768962	33.984033	648.078887	18212.766133	18860.84502	6432	287055	32.456498	163998	32736.032262	206433	496.02439	107.663027	1186.000936	0	570.148281	1065.739893	11.3229	2.403	54.765	2.5839	0	6.9147	11.9232	6.8976	2.8917	0	18.2376	14.3262	5.4756	0	61.6626	.915388059	.615314	538	804.134831	386.519082
R-11	28.176872	6105	19.5448291366	31.136878	649.373239	13022.634444	13672.007683	5428	557802	77.874407	399303	339629.77279	146133	1947.66	138.723618	750.628537	0	3233.028918	749.520199	11.1069	1.5354	30.0402	1.3995	0	17.9811	26.6067	8.2161	1.6641	0	29.088	28.1421	3.0636	0	38.2563	1.253664673	.683982	609	3468.222222	244.284857
R-13	29.469956	2734	17.874218411	32.44184	1084.220081	6200.041541	7284.261622	2397	733725	76.002453	614682	433062.356688	73035	1059.3	101.689189	61.295149	0	3051.264336	694.300292	5.5206	1.6416	19.5192	.0765	0	11.4606	54.2241	6.7599	.8073	0	16.9812	55.8657	.8838	0	26.2791	1.336718033	.684819	264	4955.097345	279.667908
R-14	27.874543	3600	18.5006229172	31.548331	2295.732645	7485.874304	9781.606949	2141	621189	76.0507669999999	454716	362847.214108999	126882	3165.782609	133.335849	905.769134	0	1468.069975	613.672538	6.1002	.945	27.027	3.7494	0	15.7131	31.3353	10.5633	4.3245	0	21.8133	32.2803	8.0739	0	37.5903	1.404566022	.688795	537	2378.316176	239.663395
R-5	29.393428	8401	19.2064051288	32.256255	1533.354896	17247.038171	18780.393067	7771	358650	11.156838	189846	17063.759247	221454	1037.093656	59.634375	739.979421	0	579.343557	491.308503	17.0019	1.2591	43.0902	2.9349	0	17.262	10.1718	5.7204	2.4579	0	34.2639	11.4309	5.3928	0	48.8106	1.052703111	.622804	866	820.787234	259.164539
R-6	30.398034	5247	20.8474439139	32.414067	2966.53927	17367.796831	20334.336101	3186	260451	12.623104	134037	12632.077992	221913	995.814159	62.171501	2204.125841	0	349.321301	895.987125	12.5307	2.3571	56.3976	1.9287	0	9.8532	10.2258	4.9068	.9324	0	22.3839	12.5829	2.8611	0	61.3044	.858011262	.607661	737	565.748879	318.801042
R-7	28.900636	4557	23.8541973152	31.417607	3384.078171	13580.020211	16964.098382	935	227664	41.196237	142128	43809.862429	215559	1156.6875	187.651685	969.10283	0	362.978672	3426.299174	3.3102	3.4992	66.1383	3.7161	0	2.1789	9.5229	9.9531	.8442	0	5.4891	13.0221	4.5603	0	76.0914	.83119714	.612073	284	618.295775	760.763637
R-8	28.108524	3519	26.5013613448	30.820257	5888.06387	12561.997794	18450.061664	2108	97191	16.3626259999999	52470	7523.660802	389466	45.734694	202.379104	448.749884	0	141.345922	36015.552249	.1557	2.0034	83.4813	2.4003	0	.0495	2.5137	6.7068	.2304	0	.2052	4.5171	2.6307	0	90.1881	.430367759	.542338	222	302.364238	1752.851469
R-9	28.625891	8155	25.124681605	31.040853	7236.604643	13300.156358	20536.761001	4200	264276	35.921537	147267	37216.545975	165807	256.898361	136.109065	2390.257245	0	292.332704	2138.111217	5.0058	3.0717	60.6159	1.9503	0	2.8422	10.953	9.5562	2.5821	0	7.848	14.0247	4.5324	0	70.1721	.908951888	.59935	297	493.136842	560.096055
S-10	30.443952	10399	20.649978922	32.520718	376.601191	19571.760181	19948.361372	7807	253935	18.681552	165222	19372.7205739999	255825	298.572816	102.898305	3573.116738	0	763.486554	3371.877719	11.6469	1.4553	56.8557	3.8862	0	3.7359	9.7515	5.4207	5.7393	0	15.3828	11.2068	9.6255	0	62.2764	.838444349	.634166	474	943.575	542.066831
S-11	29.673106	8468	18.730427402	31.331144	1359.868257	15411.730186	16771.598443	3277	372528	17.269037	189630	21623.237969	191700	957.72885	67.612999	6655.647637	0	409.792336	400.710539	19.4508	.7416	40.3929	1.9314	0	24.6771	4.671	4.563	3.3813	0	44.1279	5.4126	5.3127	0	44.9559	1.062796637	.611087	1038	503.490566	187.891601
S-12	28.92242	7416	18.1763127295	30.531169	450.034119	15170.761759	15620.795878	3663	492057	13.792914	273249	38560.392095	159147	4307.652893	55.441837	1203.276107	0	1276.613794	292.100115	17.5806	.7596	32.1525	.6354	0	34.3854	7.9884	5.4126	1.0485	0	51.966	8.748	1.6839	0	37.5651	1.226575187	.634327	1079	1873.125	150.474678
S-13	28.429704	8002	18.4870728299	30.354602	0	14639.950345	14639.950345	3751	439983	50.0869349999999	217746	133008.516517999	203751	2032.75	100.639676	932.437245	0	318.438906	486.672638	12.6963	1.8432	38.4066	2.2725	0	23.8734	6.2271	12.4713	1.278	0	36.5697	8.0703	3.5505	0	50.8779	1.107205074	.631274	904	634.251969	228.197853
S-2	26.652243	2923	18.0732078263	31.75135	2060.97215	6581.446796	8642.418946	1595	689544	52.338937	545139	211213.476585	92340	2537.298701	84.627273	319.285412	0	4137.136208	441.728692	7.4115	.9657	22.2813	.6642	0	12.1986	48.3093	5.5872	2.7279	0	19.6101	49.275	3.3921	0	27.8685	1.409211365	.713223	427	5815.694118	219.300241
S-3	26.376315	4135	17.7512061835	29.550864	0	8781.819042	8781.819042	3121	655632	80.994674	515700	432879.913821	104256	3305.068966	109.423193	78.175795	0	2485.979723	418.934526	9.7254	.7785	23.7618	.0297	0	19.0521	37.8792	7.2414	.4104	0	28.7775	38.6577	.4401	0	31.0032	1.377363544	.713042	558	4375.213483	189.018848
S-4	29.149154	6851	18.7103046432	33.545599	247.763028	15555.535712	15803.29874	5639	358164	29.575837	210942	45742.493668	205767	797.915094	83.65976	1497.616902	0	761.195463	760.761363	13.581	.9423	44.2539	5.22	0	11.6667	10.1187	7.6797	6.3387	0	25.2477	11.061	11.5587	0	51.9336	1.023315791	.646116	732	1029.196262	284.205735
S-5	29.974602	10034	20.1350414164	32.534635	2025.008666	15728.098261	17753.106927	7232	291078	37.304434	170262	49620.84633	225342	489.854508	107.475983	1224.3097	0	592.123959	1063.232338	15.1776	1.6182	52.6203	1.5228	0	8.6094	11.8791	7.3683	1.17	0	23.787	13.4973	2.6928	0	59.9886	.921277299	.628865	740	809.892216	307.703371
S-7	29.116764	5442	26.5761711693	32.237613	5843.731663	18207.57547	24051.307133	3623	64827	25.128419	31743	5395.72803	407070	107.859375	105.380597	900.306439	0	225.645115	21031.231521	.5517	1.6191	89.9397	.9936	0	.1395	2.6721	2.8035	.8244	0	.6912	4.2912	1.818	0	92.7432	.314983101	.538383	266	420.352941	1532.383308
S-8	28.763228	8919	27.4026145627	30.796845	7138.63154	15177.355325	22315.986865	3631	103671	6.129004	41625	2427.075527	369288	170.237288	136.099237	509.163355	0	123.971261	14204.197916	.783	1.6794	79.8408	4.4388	0	.2322	2.4291	5.3451	2.205	0	1.0152	4.1085	6.6438	0	85.1859	.450482909	.535019	254	255.88125	1459.909464
S-9	29.490607	6191	24.151849356	32.879423	1770.308992	11895.543746	13665.852738	2241	208728	11.961021	90459	5422.85702	275454	169.658385	72.600834	1164.976582	0	300.910595	3313.63718	2.8746	1.9233	56.2374	17.73	0	2.5767	3.6018	5.1948	9.3393	0	5.4513	5.5251	27.0693	0	61.4322	.712976781	.550313	269	474.846154	1026.059879
T-10	29.359481	8581	22.041119152	32.68283	2164.644031	10190.525393	12355.169424	8944	288774	21.816369	171432	34301.18226	279576	321.190909	113.604878	481.012319	0	586.716164	2369.719898	5.8158	2.3562	54.4743	7.3467	0	4.7781	12.2814	6.9912	3.9159	0	10.5939	14.6376	11.2626	0	61.4655	.897230375	.631845	377	933.721519	745.385838
T-11	29.390152	6955	19.6276921308	32.088932	1147.152729	13748.553702	14895.706431	6043	434745	63.989235	305298	184237.791181	204210	406.279188	85.389163	1646.840271	0	1410.618295	1048.531748	6.606	4.2975	41.7267	3.7062	0	9.3744	24.0615	6.9093	3.2373	0	15.9804	28.359	6.9435	0	48.636	1.183463151	.672932	563	1942.027397	366.665266
T-12	28.751982	9196	18.5257838279	31.965666	1562.914287	11207.035439	12769.949726	8361	481545	34.393047	318618	86327.6129519999	181701	944.878788	92.214886	3814.618095	0	1275.625372	657.416887	10.6668	2.1321	37.0386	2.4102	0	17.2251	17.3583	7.6455	5.2344	0	27.8919	19.4904	7.6446	0	44.6841	1.227136855	.654709	727	1577.16	253.039894
T-13	28.774273	8142	18.2988716983	30.759263	0	16627.182242	16627.182242	4116	395856	28.887777	210357	41157.7832849999	221274	2066.264151	69.899702	770.391669	0	245.603376	406.152763	16.1091	.1719	41.7888	2.4426	0	27.7326	2.5344	7.0353	2.3283	0	43.8417	2.7063	4.7709	0	48.8241	1.085664761	.626744	1119	310.965517	201.181296
T-14	28.154768	6092	18.4688480939	30.510022	0	13031.053519	13031.053519	4242	562059	56.674833	368253	190316.946965999	154323	5607.461538	50.368683	275.304104	0	2155.83302	277.031624	14.4792	.4995	28.2924	.5013	0	29.0916	20.4399	6.0111	.4743	0	43.5708	20.9394	.9756	0	34.3035	1.283240503	.671711	1025	3373.403226	153.859191
T-3	27.224852	3334	18.1273584514	30.792169	278.548355	9135.123041	9413.671396	2803	698688	76.306162	544581	415038.267184	91386	2608.864078	60.75641	560.261401	0	3031.046038	271.219184	7.281	2.2932	18.0072	2.8989	0	19.557	43.218	4.2597	2.6352	0	26.838	45.5112	5.5341	0	22.2669	1.369431441	.702021	590	5497.481928	158.269104
T-4	28.080511	3108	18.0784377611	31.424648	0	12802.259997	12802.259997	2231	438615	48.484662	305343	112028.409418	172314	1001.356021	97.858097	1237.389995	0	653.72798	631.508251	9.7209	1.1799	35.5113	6.3207	0	9.3159	14.8905	5.8437	10.5111	0	19.0368	16.0704	16.8318	0	41.355	1.214764677	.676409	596	1340.55	292.385938
T-5	27.451377	2660	19.2887882457	30.977446	556.91672	8871.051962	9427.968682	2744	596421	50.4851439999999	476145	218723.954323	108900	523.290837	121.872699	454.71859	0	1617.113033	1286.324474	5.7303	1.6353	31.2354	1.9206	0	7.3089	38.8161	7.9029	5.4027	0	13.0392	40.4514	7.3233	0	39.1383	1.392511388	.710194	288	2951.80292	381.641227
T-8	29.666807	5198	25.7191952479	32.070335	1853.927953	14150.505911	16004.433864	482	180999	14.6089199999999	93888	10742.934961	233586	396.431507	175.674569	837	0	139.386223	4061.537306	4.1643	3.1752	70.9254	.7461	0	1.6335	7.1685	8.1504	.5967	0	5.7978	10.3437	1.3428	0	79.0758	.721479843	.590488	288	393.320611	814.085962
T-9	30.390863	4337	24.9677262074	32.41177	3529.138471	14631.465966	18160.604437	3154	240804	9.59411	124704	9126.24958899999	188766	436.42437	105.100145	2379.837498	0	359.130003	1989.126948	7.0767	4.1895	60.8265	2.4894	0	3.33	11.457	7.2243	1.8063	0	10.4067	15.6465	4.2957	0	68.0508	.797215034	.562513	369	747.215311	516.167412
U-10	29.552585	10390	20.5749961784	32.400145	3389.677521	14874.814007	18264.491528	5688	343098	24.4137239999999	186345	43372.0387699999	227700	842.641399	98.334129	568.252629	0	508.49588	881.628993	15.0255	.9504	47.8134	1.926	0	13.8483	11.1564	8.172	1.071	0	28.8738	12.1068	2.997	0	55.9854	.991280932	.636616	746	788.294118	309.230651
U-11	29.139193	5332	19.3577291402	35.134233	1888.929364	5522.150845	7411.080209	5459	563193	76.398677	422622	331767.058391999	125415	3791.596154	120.156576	1668.845952	0	7171.179604	447.448207	6.9273	10.3518	21.5676	5.1435	0	12.78	20.4471	5.7429	17.0037	0	19.7073	30.7989	22.1472	0	27.3105	1.305205667	.684008	511	10673.68966	248.067
U-12	29.098042	9353	18.6391210986	31.457332	1060.201294	15424.998617	16485.199911	8432	391770	19.8874339999999	237060	30147.6008269999	203508	1102.633663	76.606452	825.878826	0	906.594099	511.205843	15.5772	1.287	43.4133	.6255	0	17.6454	13.2822	7.0767	.9432	0	33.2226	14.5692	1.5687	0	50.49	1.116086523	.643365	915	1329.381818	225.438795
U-13	28.671394	6313	18.0522845988	30.674662	1117.570397	12598.693009	13716.263406	2839	517491	17.351606	303795	35049.3864069999	147987	7057.058824	117.898862	2181.380215	0	1087.868829	339.769869	15.9318	.918	29.5281	2.0925	0	32.0427	5.8167	9.3672	4.4559	0	47.9745	6.7347	6.5484	0	38.8953	1.249909235	.642688	980	1314.346154	154.115715
U-3	26.27728	2508	18.2321598794	29.548532	1185.81036	8770.776852	9956.587212	1865	685134	82.0232249999999	542475	467145.927121	86193	948.51	59.003534	113.875814	0	2373.033445	295.377208	7.0704	.9477	20.7018	.4032	0	11.6874	47.1366	4.9923	2.6172	0	18.7578	48.0843	3.0204	0	25.6941	1.330318384	.736892	544	4275.241071	162.197367
U-4	29.424852	6266	18.4338420831	33.276313	980.871358	17152.158362	18133.02972	4183	367740	35.846794	242739	53017.219824	201996	404.692308	73.416465	744.507805	0	993.186628	914.933501	11.2635	1.6092	47.7045	2.8602	0	7.614	19.6524	6.0813	3.1716	0	18.8775	21.2616	6.0318	0	53.7858	1.063716957	.661026	663	1310.817073	307.782351
U-5	28.963293	3254	19.8624668233	32.309727	262.201029	10119.488421	10381.68945	1827	599562	70.8622289999999	482517	307041.198054999	93960	503.810924	98.439297	555.689007	0	2655.496355	556.116889	7.2135	3.618	27.306	1.8648	0	4.7196	45.747	6.1335	2.0214	0	11.9331	49.365	3.8862	0	33.4395	1.324386875	.67087	383	4093.363636	248.887957
U-6	29.253039	1722	21.2067012235	31.256334	2866.81677	9982.429528	12849.246298	1444	402948	21.265523	285561	37402.0613779999	146115	589.330189	199.054455	156.587239	0	697.972457	2171.124472	4.1139	2.7027	52.2657	.7785	0	2.0304	24.6204	12.0177	.7686	0	6.1443	27.3231	1.5471	0	64.2834	1.142345574	.651172	235	1667.072727	688.939602
U-7	29.072129	2127	22.3228570386	31.737402	852.791967	13244.257847	14097.049814	1568	382752	14.921934	247527	24947.646163	135315	851.802632	143.695775	197.922798	0	742.508251	913.604908	8.4177	12.9834	39.3165	1.1376	0	4.4802	22.9095	10.1817	.6687	0	12.8979	35.8929	1.8063	0	49.4982	1.150160632	.630934	368	2131.928571	370.328842
U-8	29.218709	2328	22.908018483	31.660386	2018.531847	10430.156517	12448.688364	909	380403	52.949109	276291	112224.796153	130959	880.212329	157.402174	254.822369	0	1341.656008	1412.84469	8.6049	4.5693	46.8135	.8433	0	4.1985	23.5377	8.6967	1.3689	0	12.8034	28.107	2.2122	0	55.5102	1.10499321	.654619	411	1857.730263	321.560287
U-9	30.590253	4621	22.0221959074	33.632939	2659.554412	12598.70729	15258.261702	2639	251109	15.167915	137763	14736.4140709999	190287	692.144487	113.569873	1489.921394	0	547.271053	1772.351845	11.745	2.6325	56.5875	3.897	0	6.4062	8.6985	6.2379	3.7161	0	18.1512	11.331	7.6131	0	62.8254	.836137282	.592471	497	1103.242718	386.466287
V-10	29.951904	3386	20.3028648675	32.944113	2233.924194	9899.116013	12133.040207	2159	227394	11.8261699999999	104976	9511.28947999999	178542	1310.707317	82.986859	967.830686	0	448.493112	1496.000411	8.1144	7.9119	59.0481	1.8891	0	7.9947	7.5861	6.2991	.6336	0	16.1091	15.498	2.5227	0	65.3472	.786298295	.592843	534	723.53271	337.487527
V-11	29.77111	11478	19.7108691973	32.474341	2196.438006	17203.520514	19399.95852	7315	275193	25.499558	166797	33197.725186	251055	418.890625	96.767773	382.349125	0	1408.739574	837.939958	14.9778	1.251	54.6354	1.4508	0	9.0765	11.4336	6.1002	.837	0	24.0543	12.6846	2.2878	0	60.7356	.891682051	.650443	810	1627.615385	311.876261
V-12	28.75728	7492	19.2294581917	30.787417	1652.846074	15064.055106	16716.90118	6126	370854	48.859389	217782	92409.728486	222750	823.885714	107.228571	1499.25195	0	936.999652	579.463692	14.9499	1.3185	45.1647	1.7154	0	16.4502	8.0595	8.9316	3.375	0	31.4001	9.378	5.0904	0	54.0963	1.041693164	.645388	902	1090.046512	250.28562
V-4	27.330054	3647	18.3661358135	30.618196	0	9209.084866	9209.084866	2082	667485	76.208454	533997	390633.648823999	97173	1698.333333	87.774862	50.943099	0	3238.621028	327.843116	10.2033	1.1367	21.6504	.2295	0	12.6504	44.514	6.3378	.3672	0	22.8537	45.6507	.5967	0	27.9882	1.430895464	.696953	683	5599.536585	145.431994
V-5	29.818884	6785	18.8108018114	31.391954	0	18801.413364	18801.413364	3156	363906	39.996043	233856	66488.465796	200196	523.612205	55.8	586.937011	0	716.370127	398.020576	14.8545	.7938	46.1979	1.4319	0	11.673	18.5076	4.9185	1.1943	0	26.5275	19.3014	2.6262	0	51.1164	1.045478501	.629393	818	1420.808824	246.902502
V-6	29.204731	1332	19.6838341392	33.41218	1091.551482	7545.414058	8636.96554	1053	457425	58.085588	351369	158387.060009999	169992	381.23741	135.346709	216.923077	0	1071.831453	1896.436955	2.7243	5.8329	44.3484	.6732	0	2.5956	33.2919	8.3844	.1728	0	5.3199	39.1248	.846	0	52.7328	1.206757672	.666993	221	2105.854839	889.952237
V-7	28.604951	1092	20.0478457458	33.082597	785.360121	4638.022464	5423.382585	1131	531729	69.006957	423918	259227.834177	120267	390.717391	106.335079	60.66635	0	1481.103001	1926.387106	.9162	10.4517	35.3637	.2097	0	.8586	44.5176	6.0507	1.5381	0	1.7748	54.9693	1.7478	0	41.4144	1.321032284	.695161	109	3427.602484	1110.98819
V-8	28.695222	1832	20.7354210748	32.91871	2451.799976	6920.635074	9372.43505	1798	345051	17.731292	242037	34662.523566	156987	307.737624	118.298077	6386.728017	0	1187.255474	1599.016307	4.3938	18.6615	39.2787	3.2796	0	1.8036	19.017	6.1389	7.5789	0	6.1974	37.6785	10.8585	0	45.4176	1.023475693	.642125	294	2041.686486	536.352269
V-9	30.067697	2539	20.948792175	32.657333	2239.966217	11835.394082	14075.360299	1194	274581	14.595693	160299	14181.2049229999	187749	583.181347	129.586667	1103.804551	0	666.347525	1708.874501	8.0262	2.3022	56.3148	2.9151	0	3.1725	10.6893	8.6949	4.3785	0	11.1987	12.9915	7.2936	0	65.0097	.873022612	.585976	479	760.604651	395.243293
W-10	29.145678	5600	19.0848715743	32.504474	0	13249.508339	13249.508339	4714	533916	47.154609	388557	143827.847616	145611	1670.389831	80.171244	609.723002	0	2089.794578	429.821622	12.9447	1.4958	30.6486	1.368	0	16.5573	30.5118	4.9365	1.5012	0	29.502	32.0076	2.8692	0	35.5851	1.28323032	.662274	766	3434.322581	193.415001
W-4	27.900273	2672	18.6629510867	31.56014	0	8598.730072	8598.730072	1805	677673	37.309587	565317	156599.687437999	87831	2066.785714	107.08	188.230028	0	17281.611145	301.956804	9.7245	2.7981	19.0278	.7767	0	10.5129	50.7258	4.8159	1.5804	0	20.2374	53.5239	2.3571	0	23.8437	1.364350992	.709648	577	25566.42857	155.530746
W-7	28.938356	4942	19.1418188111	30.789767	924.477975	15153.650587	16078.128562	3944	422136	27.596793	291006	50237.366792	160542	821.25	94.514754	612.874733	0	1173.989945	540.406303	12.8106	3.0276	40.986	1.026	0	12.5118	22.1625	5.7906	1.7352	0	25.3224	25.1901	2.7612	0	46.7766	1.18940476	.652961	729	2105.325	223.254269
W-8	29.869219	2673	19.8327538245	33.40527	977.682653	11151.666828	12129.349481	1736	340038	35.122545	238554	51053.277275	222795	353.278481	95.524333	1013.653423	0	991.308862	1314.993673	5.535	3.4758	56.142	1.0314	0	2.7972	23.4684	6.039	1.3995	0	8.3322	26.9442	2.4309	0	62.181	1.006753103	.658992	361	1461.241935	618.955824
W-9	29.711965	2956	19.6177128193	32.188978	878.324447	11197.996917	12076.321364	2128	344907	21.718028	214290	32338.6490879999	166923	608.4689	135.811373	941.387801	0	580.036557	1383.500056	7.4691	3.6693	51.4026	2.4966	0	5.2272	17.4447	9.7659	1.4679	0	12.6963	21.114	3.9645	0	61.1685	1.03074979	.619547	450	927.434211	374.313981
X-10	28.54773	6512	18.5995790186	31.818974	1098.770066	14723.545648	15822.315714	6445	463833	41.32565	346761	111336.954014	180756	313.716522	156.380153	499.499296	0	1263.397561	837.515203	9.1548	1.5201	41.2065	1.6731	0	8.8704	23.5161	10.2906	3.7062	0	18.0252	25.0362	5.3793	0	51.4971	1.294257795	.682917	563	2277	325.757864
X-9	29.825843	5536	18.9009968492	32.631894	961.601643	17199.448293	18161.049936	4550	280881	26.2392259999999	170370	26396.9377099999	220248	326.610811	122.79616	1225.17492	0	595.27502	993.89646	12.6621	2.7063	55.7604	.8028	0	5.436	13.2381	8.3286	1.0314	0	18.0981	15.9444	1.8342	0	64.089	.898577569	.635762	719	874.278689	310.230244
